# Supplementary material
Source: ML conference proceedings conference paper supplement (https://openreview.net/forum?id=Gt_GiNkBhu)
Supplement: supplementary_material [file attachment]

|             |            | Good Example 1                                                                                     | Good Example 2                                                                         | Bad Example                                                                 |
|-------------|------------|----------------------------------------------------------------------------------------------------|----------------------------------------------------------------------------------------|-----------------------------------------------------------------------------|
|             | True Texts | [CLS] the weights made the rope stretch over the pulley. [SEP] [PAD] [PAD] [PAD]                   | [CLS] every senator seems to become more corrupt, as he talks to more lobby [SEP]      | [CLS] the more does bill smoke, the more susan hates him. [SEP] [PAD] [PAD] |
| Full Grad.  | TAG        | [SEP]. made 1651 the [SEP] stretch [SEP] the rope made the rope 179 richard pull                   | [SEP] every senator seems become more talks to as [SEP], he corrupt to more lobby      | [SEP] him does more more smoke. the susan bill,. hates the more [SEP]       |
|             | LTI        | [CLS] the weights made the rope stretch over the pulley. [SEP] [PAD] [PAD] [PAD]                   | [CLS] every senator seems to become more corrupt, as he talks to more lobby [SEP]      | [CLS] the richer smoke, genius the the the, hates him. [SEP] [PAD] [PAD]    |
| Sign Comp.  | TAG        | mary? vampire 2014 could 1846 - wrote [SEP] 1846 1846 shocking. 之 [SEP] 1777                       | 1628 [MASK] 丱 [SEP]. hbo [SEP] king,!, 1792 voice [SEP] stiff,                         | :11 tried 1907 1931 [SEP]. stories 1958 [SEP] 1903 woods story 1931 the.    |
|             | LTI        | [CLS] the weights boys the rope stretched over the pulley. [SEP] [PAD] [PAD] [PAD]                 | [CLS] every senator seems to become more corrupt, ten he talks to more lobby [SEP]     | [CLS] the bill thats, all the mr, hate him. [SEP] [PAD] [PAD]               |
| Grad. Prun. | TAG        | [SEP] the the [SEP]. gilbert johnson rope memory rope rope rope stretch 60. henry                  | [SEP] because,5 talking to, [SEP] jennifer the the tenth they he with his              | [SEP] ( susan food. the hates does him [SEP] susan the more. of susan       |
|             | LTI        | [CLS] the weights kept the rope stretched broke the pulley. [SEP] [PAD] [PAD] [PAD]                | [CLS] any senator seems to become more corrupt, as he talks to more lobby [SEP]        | [CLS] the bill smoke man, the, more shave come him. [SEP] [PAD] [PAD]       |
| Grad. Purt. | TAG        | [SEP] 1829 yelling however. the the [SEP] the multitude strange rope numerous including criticism† | [SEP] significantly 將 and 𐀀 54 hallway seems. [SEP]. several sherman [SEP] obtain more | [SEP] hates they, smoke susan more the more [SEP]. the him does the did     |
|             | LTI        | [CLS] the weights leaked the the the over the pull below. [SEP] [PAD] [PAD] [PAD]                  | [CLS] every senator seems else become surviving corrupt, and, talks to, lobby [SEP]    | [CLS] i went the binoculars, the, the the the.. [SEP] [PAD] [PAD]           |
