# Supplementary material
Source: ML conference proceedings conference paper supplement (https://openreview.net/forum?id=Gt_GiNkBhu)
Supplement: supplementary_material [file attachment]

|             |     | Example 1                                                                            | Example 2                                                                         | Example 3                                                                                     |
|-------------|-----|--------------------------------------------------------------------------------------|-----------------------------------------------------------------------------------|-----------------------------------------------------------------------------------------------|
| True Texts  |     | . and Zack Novak. Burke was named Big Ten Freshman of the Year                       | 12 NCAA Division I men's basketball season. The team played its home games        | turned full circle and Capel <unk> today is just another ruined relic of                      |
| Full Grad.  | TAG | Travel and Zack Novak. Burke was named Big Ten heroman of the icago                  | 12 NCAA Division I 276's basketball season rails Theakia played its home Dalton   | turned full circle and Capel <unk> today is just9999 sadly relic Chronicles                   |
|             | LTI | of and Zack Novak. Burke was named Big Ten Freshman of the Year                      | of NCAA Division I men's basketball season. The team played its home games        | he full circle and Capel <unk> today is just another Colin story of                           |
| Sign Comp.  | TAG | . and Zack Novak. Burke was named Big Ten Freshman of the Year                       | 12 NCAA Division I men's basketball season. The team played its home games        | turned full circle and Capel <unk> today is just another ruined relic of                      |
|             | LTI | Road and totalidia fire.ly was named Big Ten Freshman of the Year                    | @ how Division I men's basketball season. The team played its home games          | Steven full 14 and withoutel <unk> his is just another dangerinks of                          |
| Grad. Prun. | TAG | of and aesthetic co counters Tenak Boolean Zack static Marlins satisfGar. SE Quentin | 12ELD Division I menanooga played itsika. The NCAA season; home bartender         | turned today circle and Cap Genetic just Hutch> another isel ruined full installment Turnbull |
|             | LTI | effort and called Novak. Burke was namedkie Ten Freshman of the Year                 | a league Division I men's release season. The team played its home games          | . On question and Sisters toward <unk>, is just anotherest Shiva of                           |
| Grad. Purt. | TAG | . and Zack Novak. was Ten Bro Big Argentine Freshman of the safer                    | 12 NCAA Division Cipher men's albums season. The team played its beginner Franken | turned full circle Drinking Capel < another> relicunk today is ruined justchance              |
|             | LTI | ) and completelyokuak. Burke was named Big Ten Freshman of the Year                  | more NCAA Division I men's basketball season. The team played its home games      | he full circle and Capel <unk> today is just another Colin story of                           |
