# Supplementary material
Source: ML conference proceedings conference paper supplement (https://openreview.net/forum?id=Gt_GiNkBhu)
Supplement: supplementary_material [file attachment]

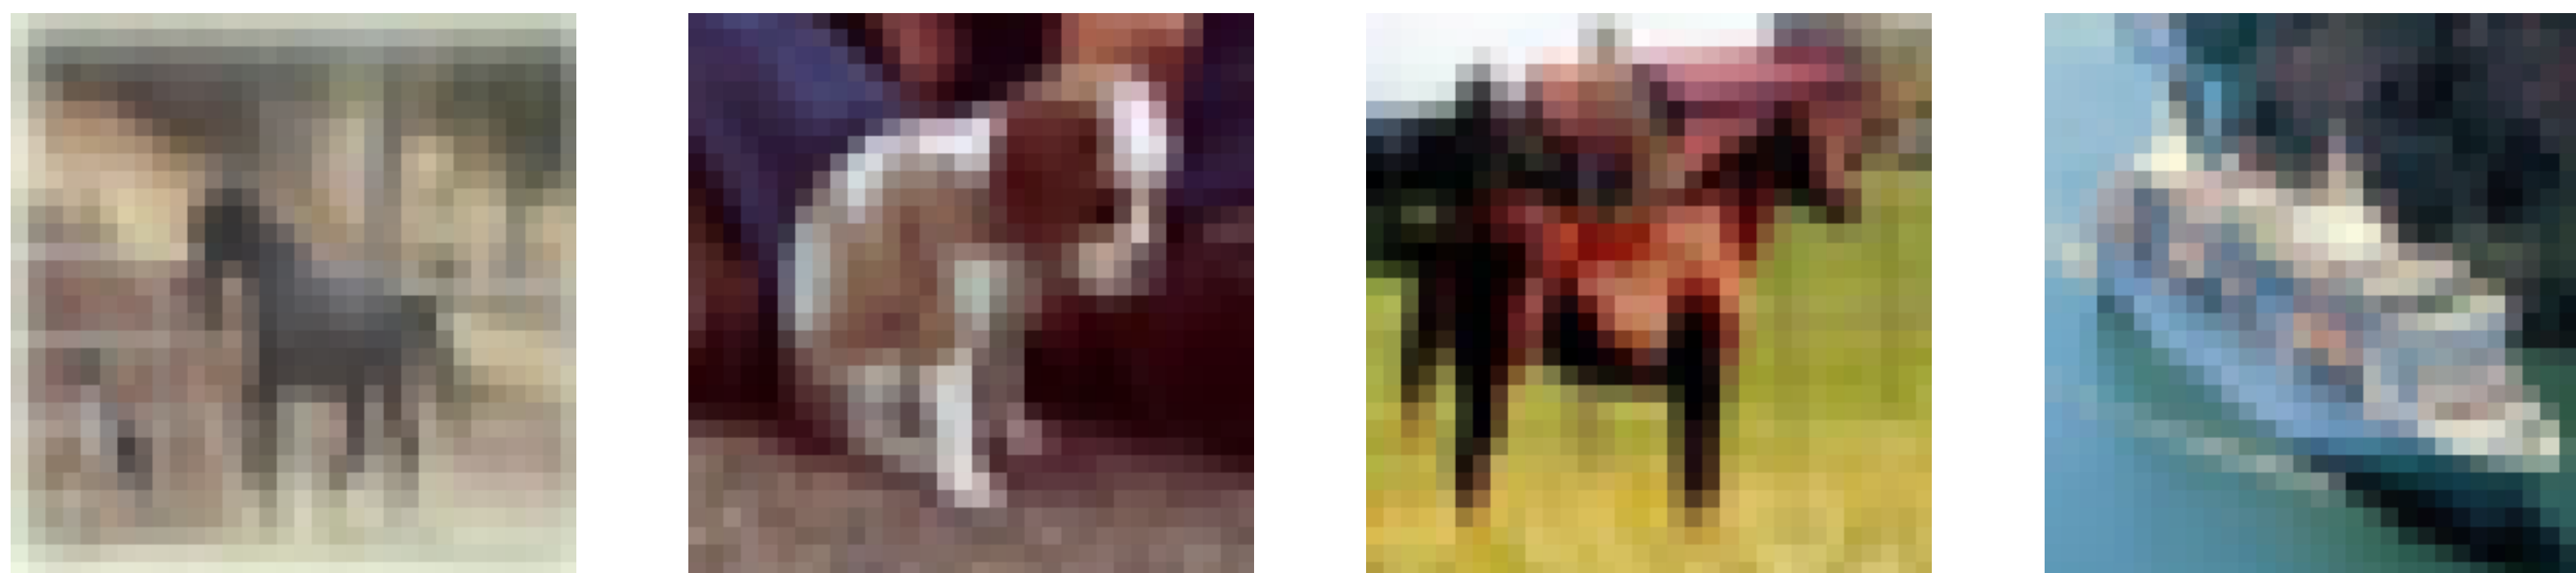

Ground Truth Images

IG

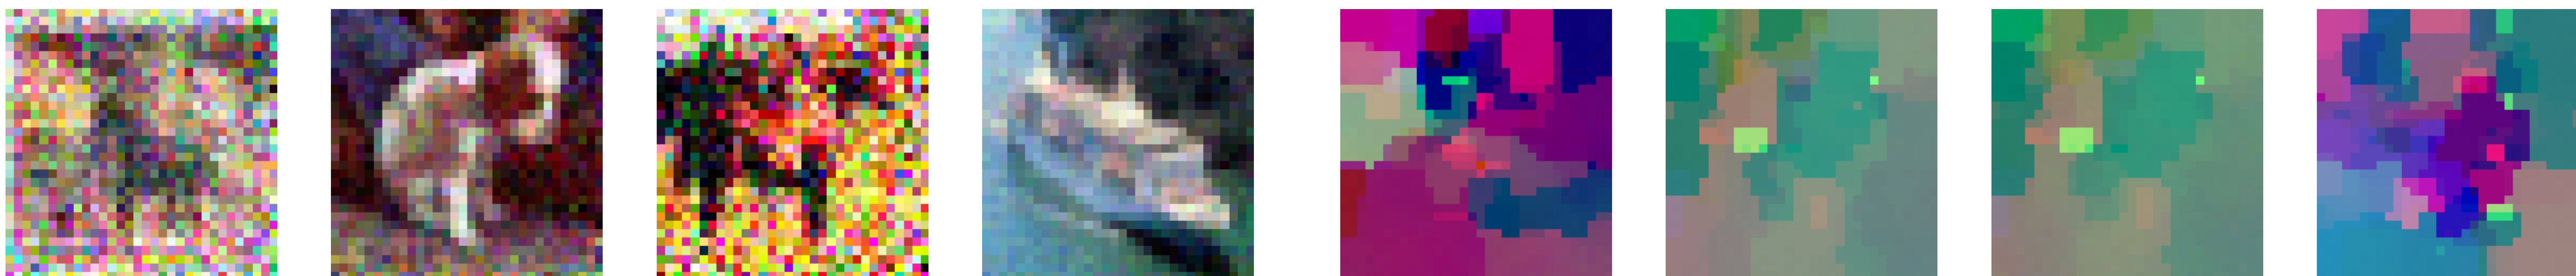

GI-GIP

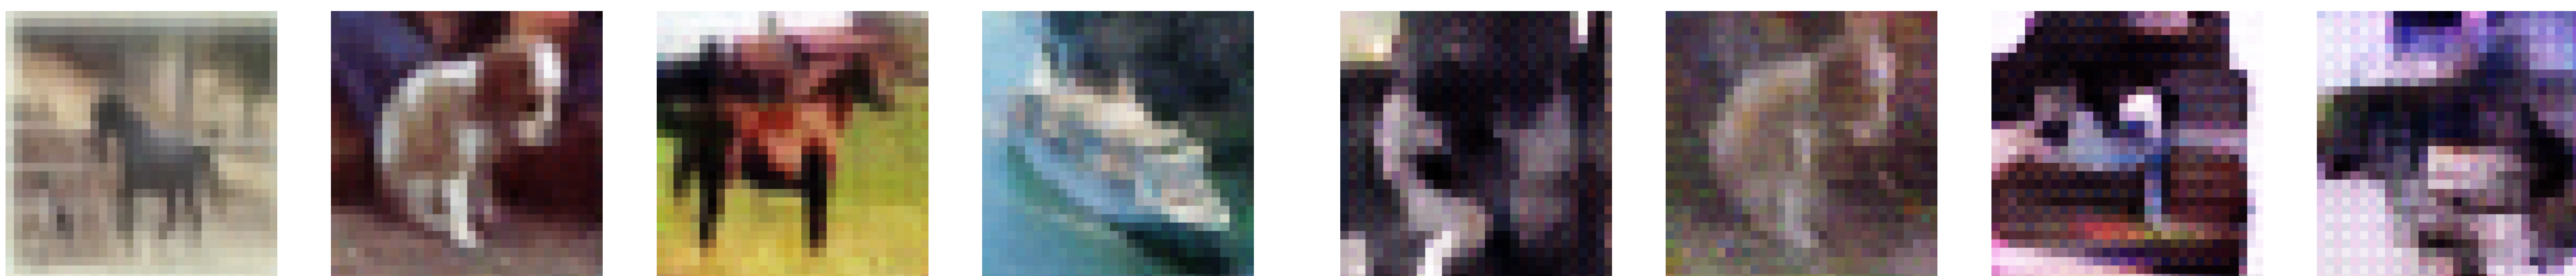

Our

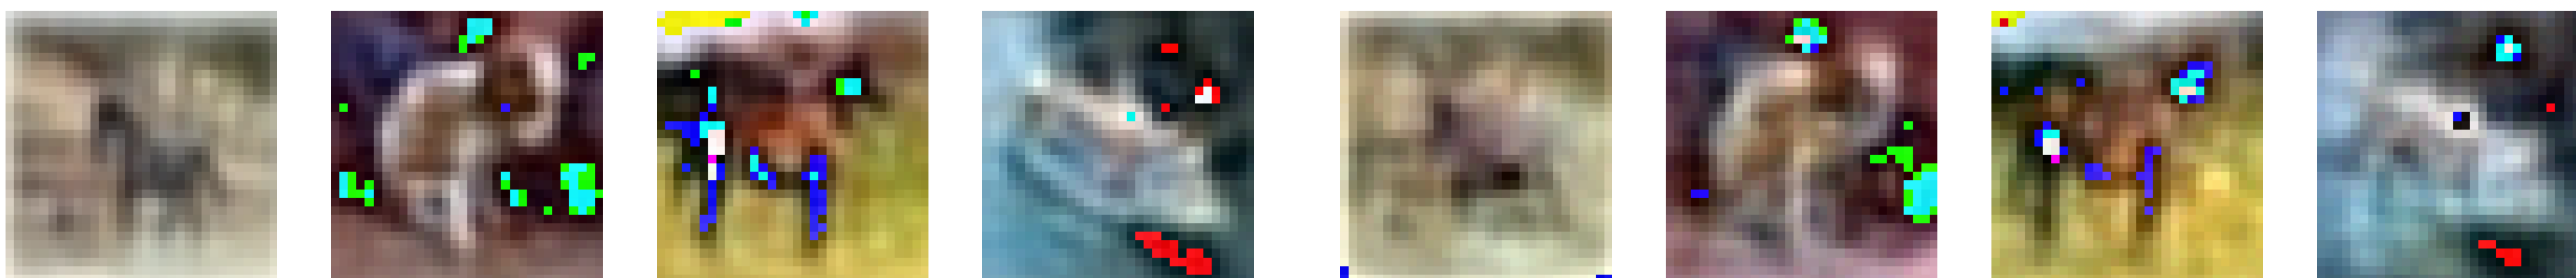

Full Grad.

Sign of Grad.

IG

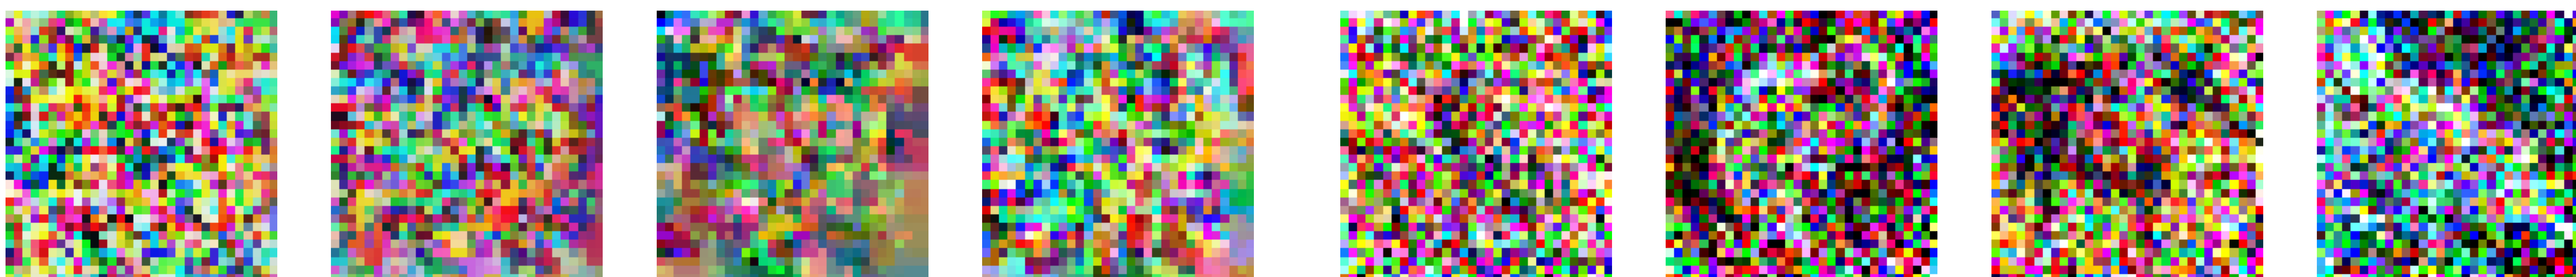

GI-GIP

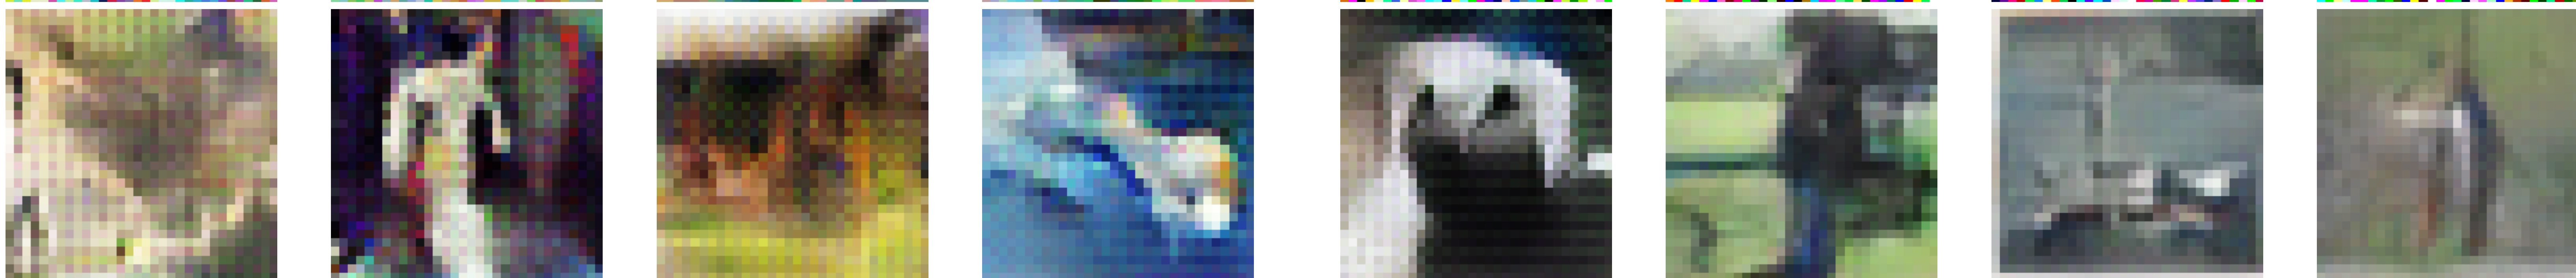

Our

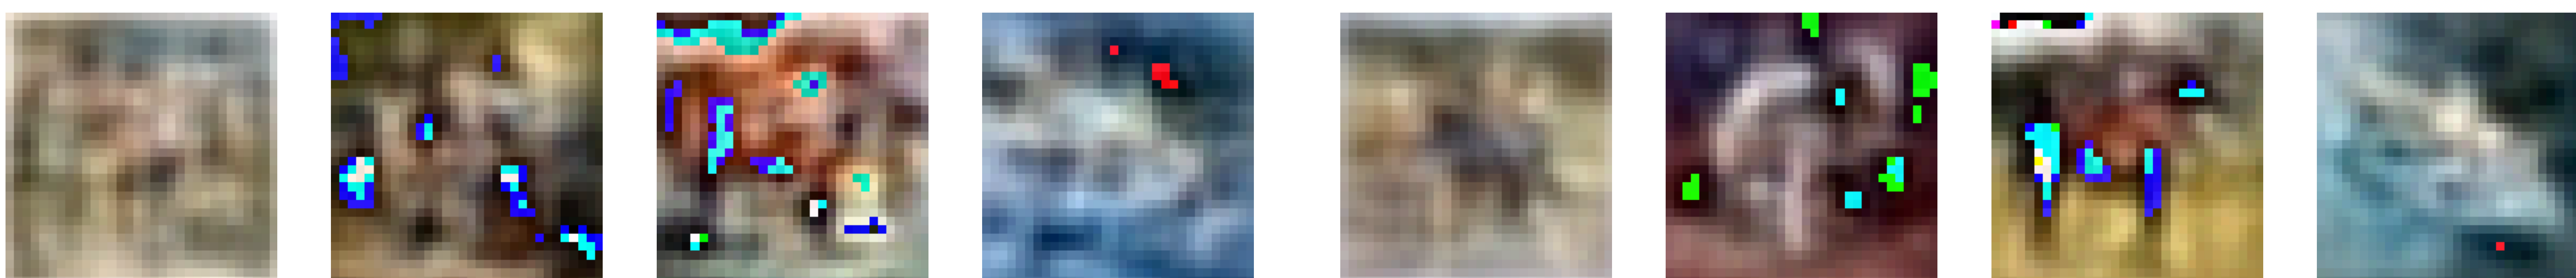

Pruned Grad.

Grad. with Add. Gauss. Noise
