# Supplementary material
Source: ML conference proceedings conference paper supplement (https://openreview.net/forum?id=Gt_GiNkBhu)
Supplement: supplementary_material [file attachment]

None

Sign Compression

Gradient Pruning

Gradient Perturbation

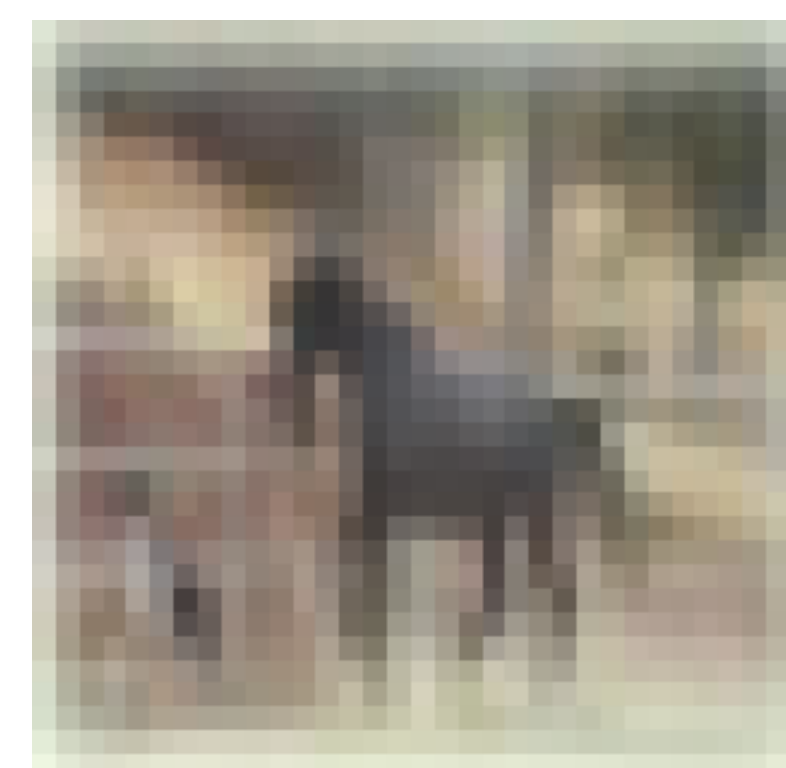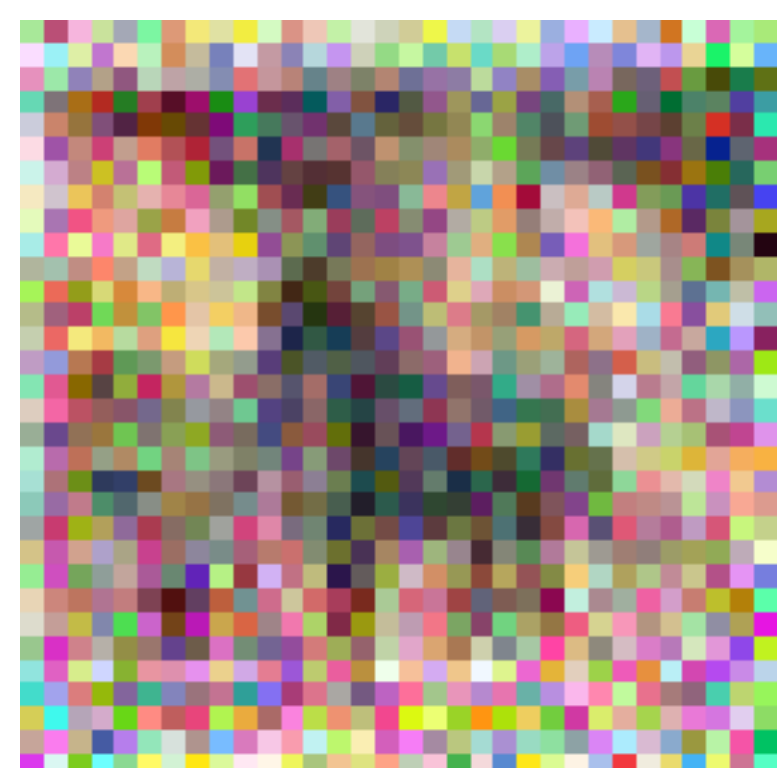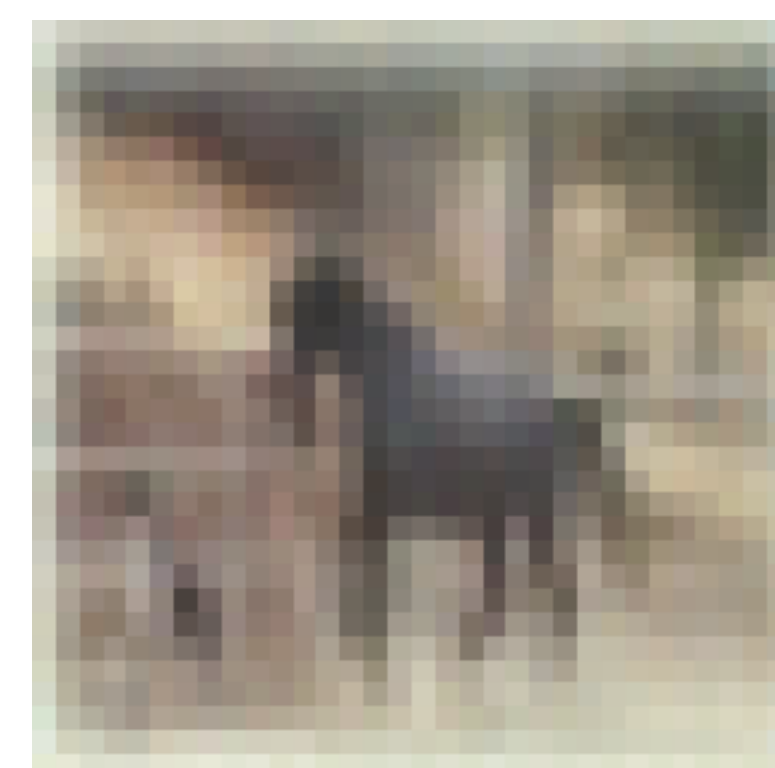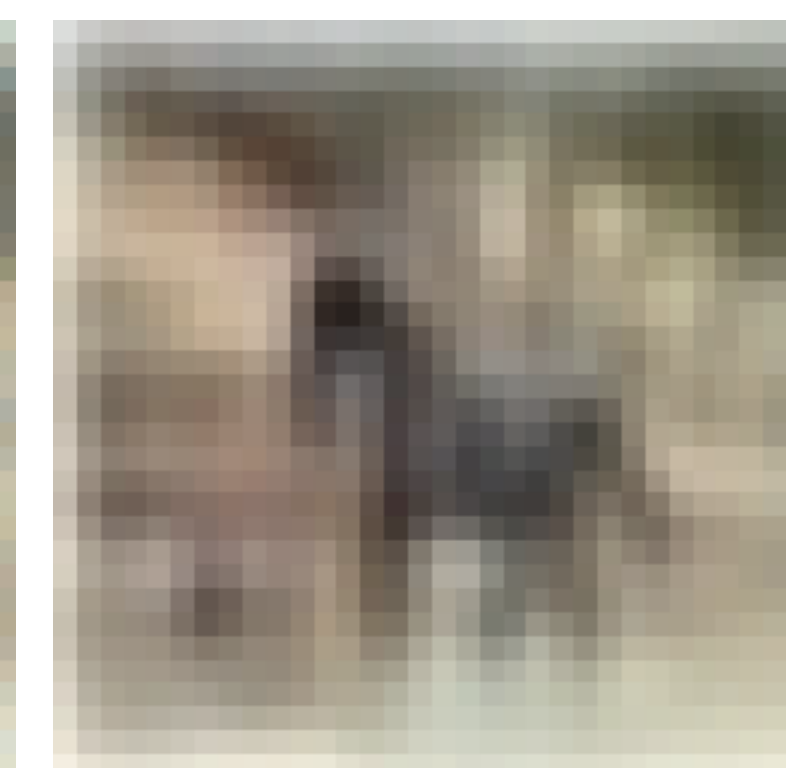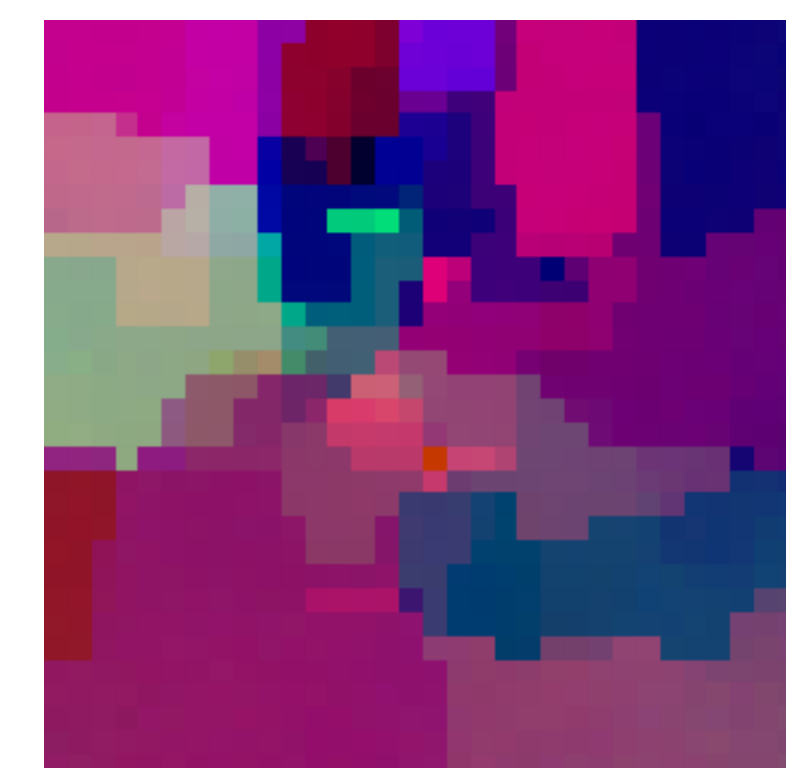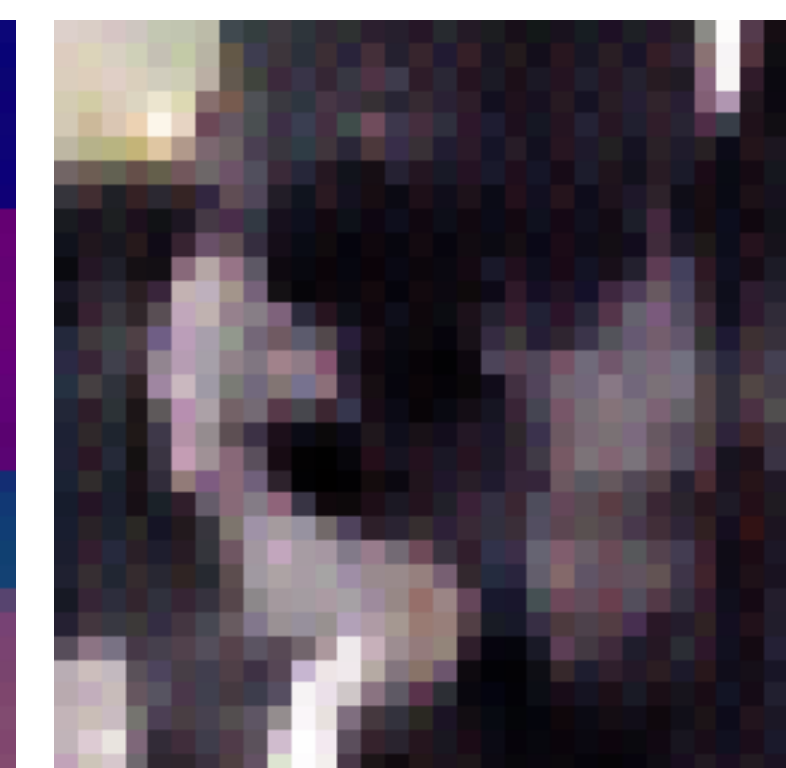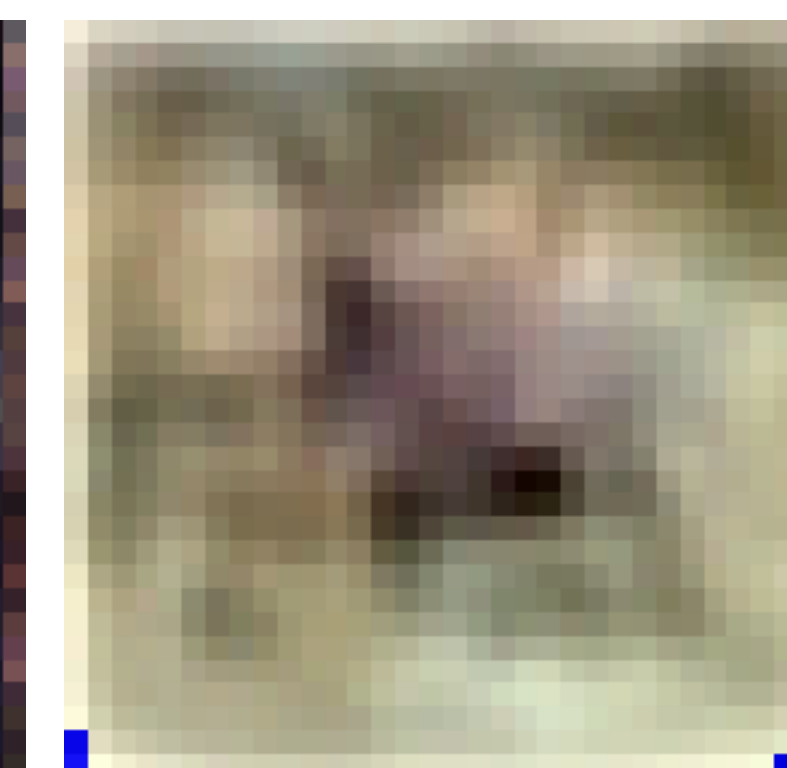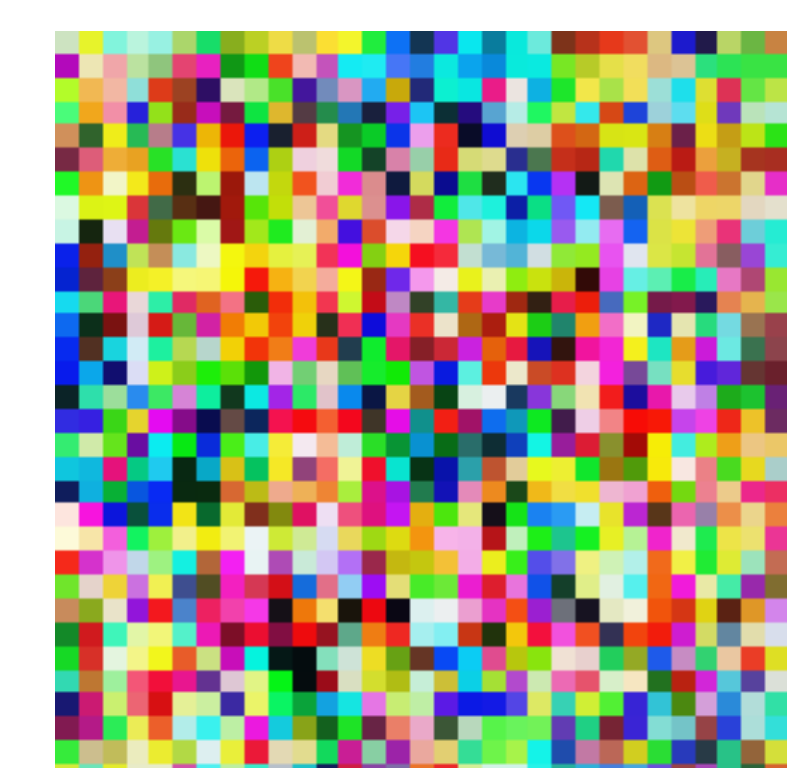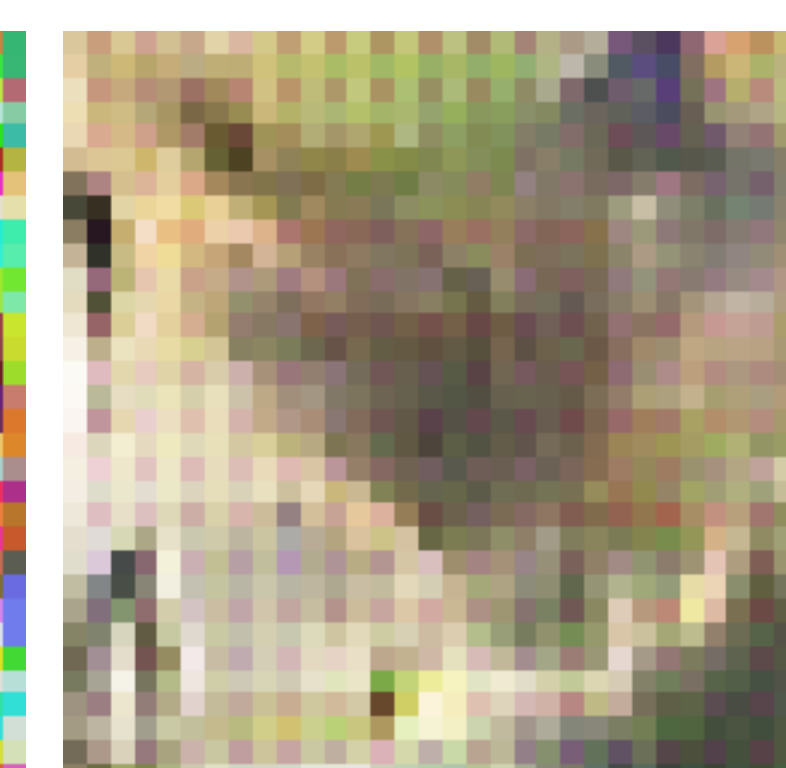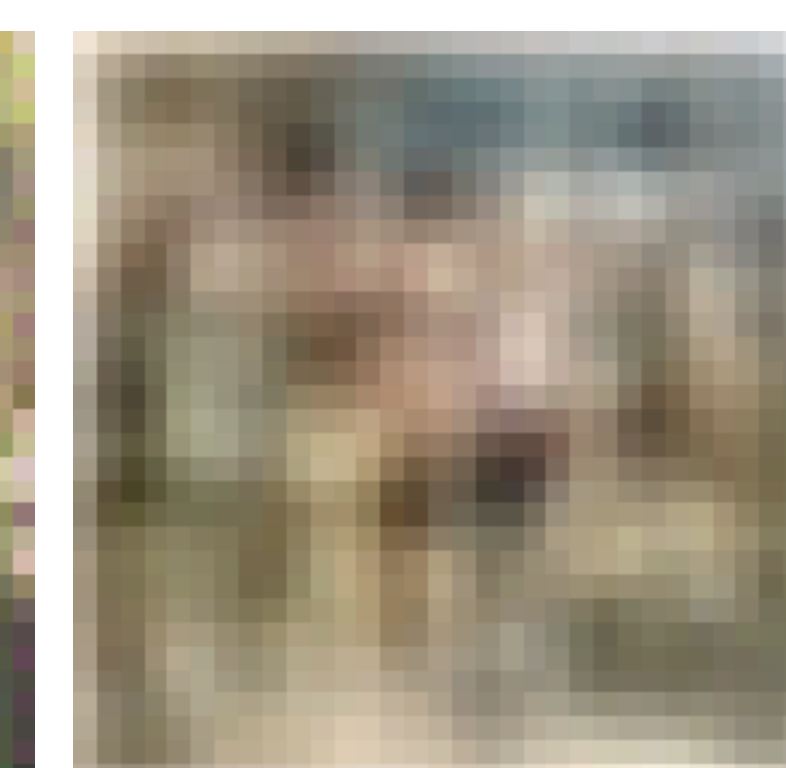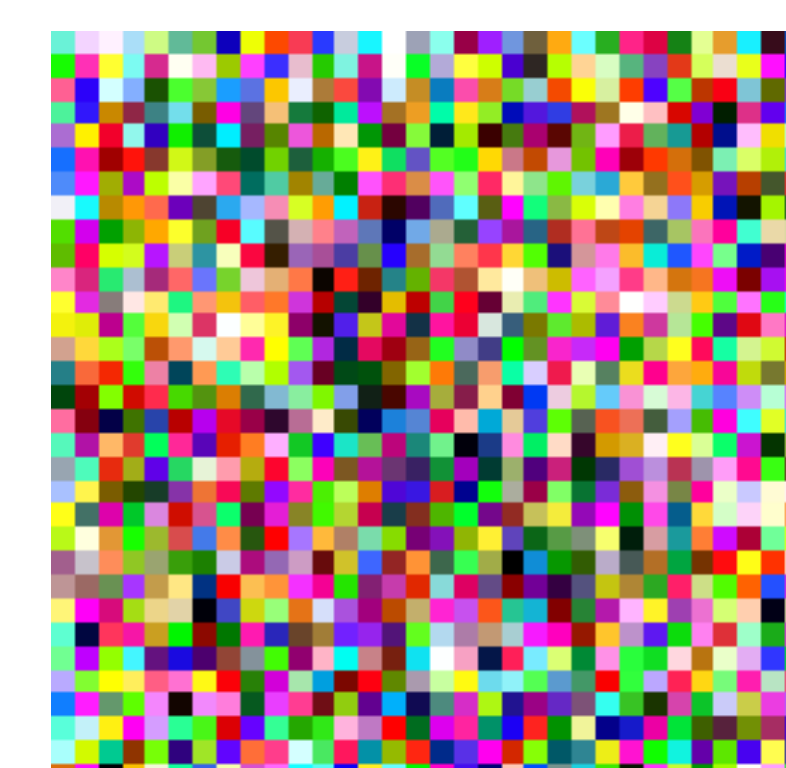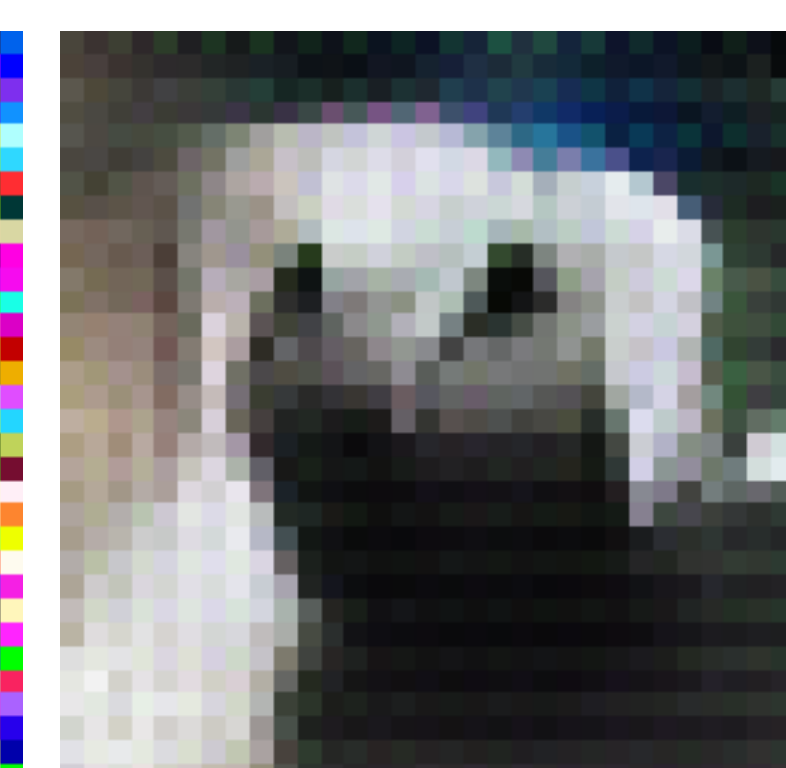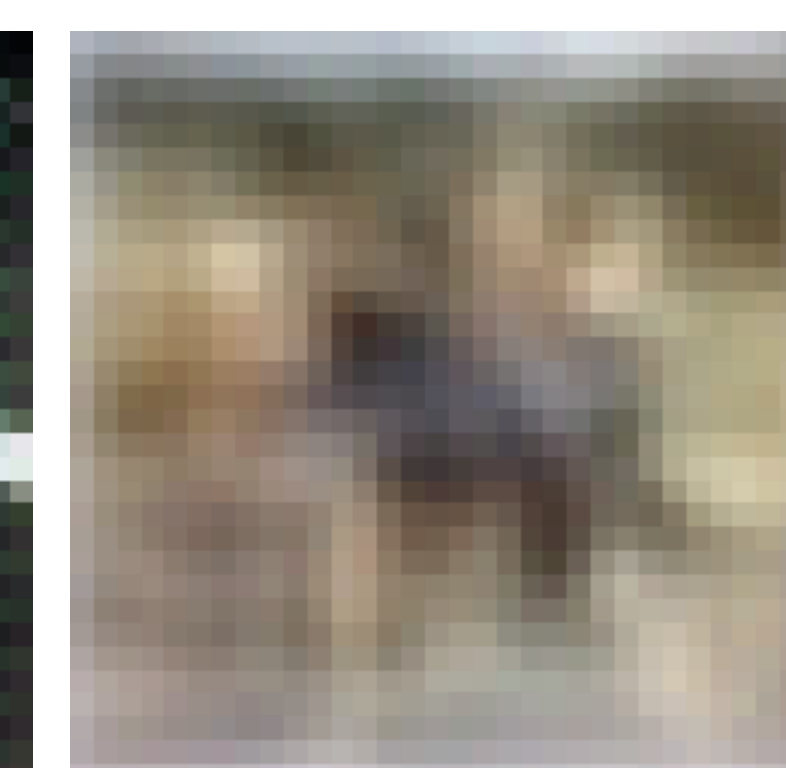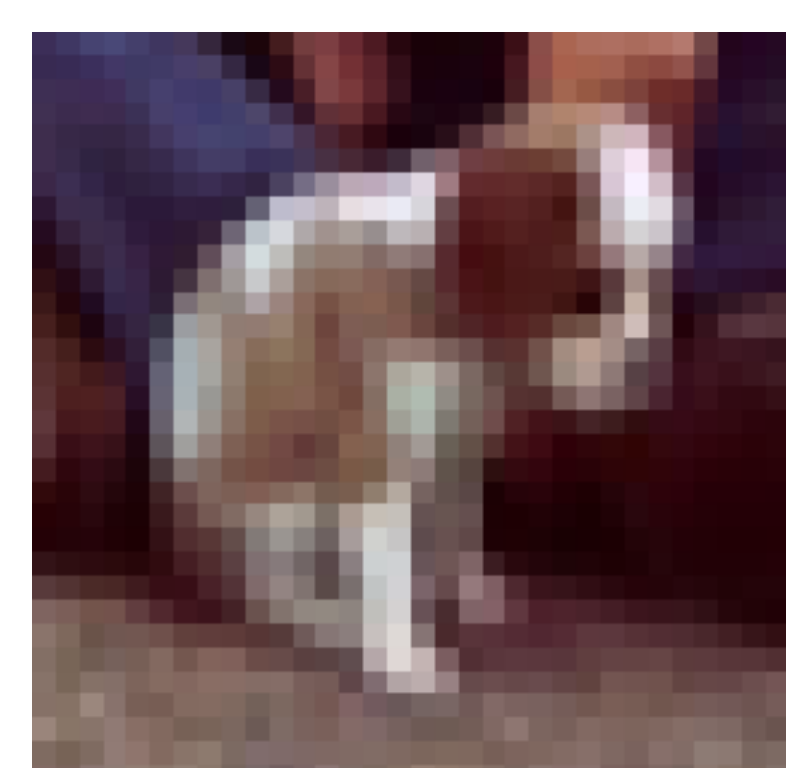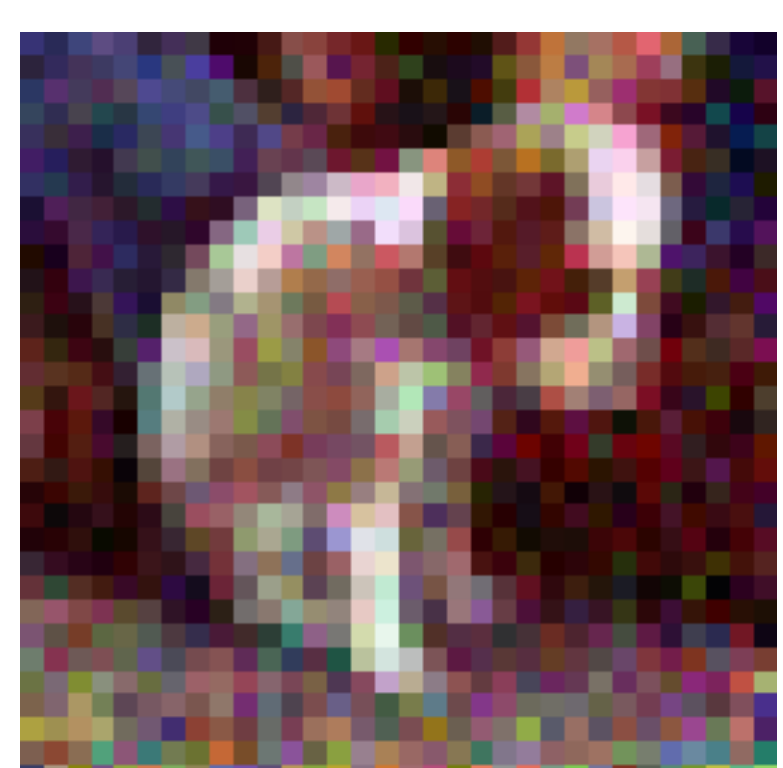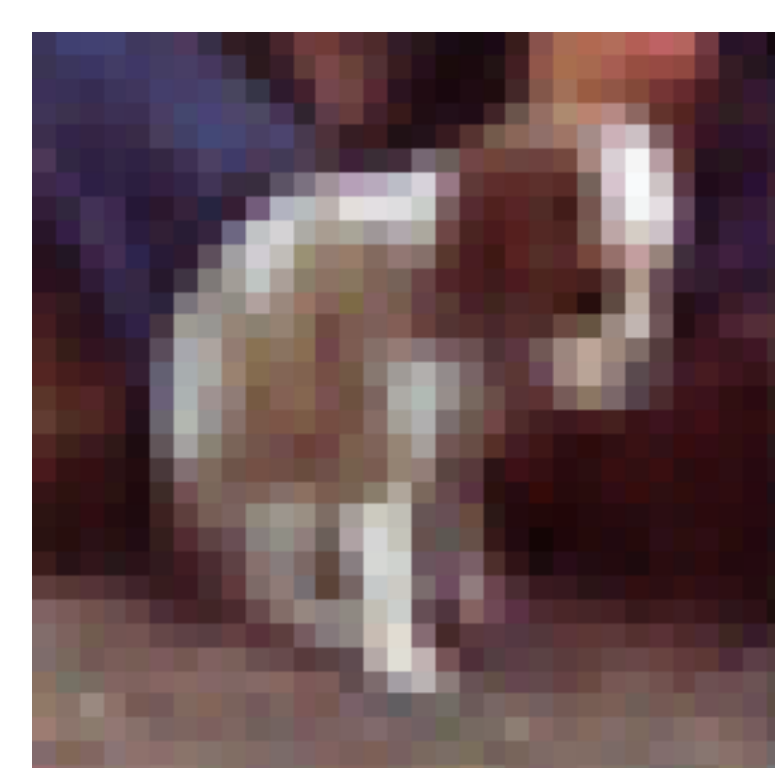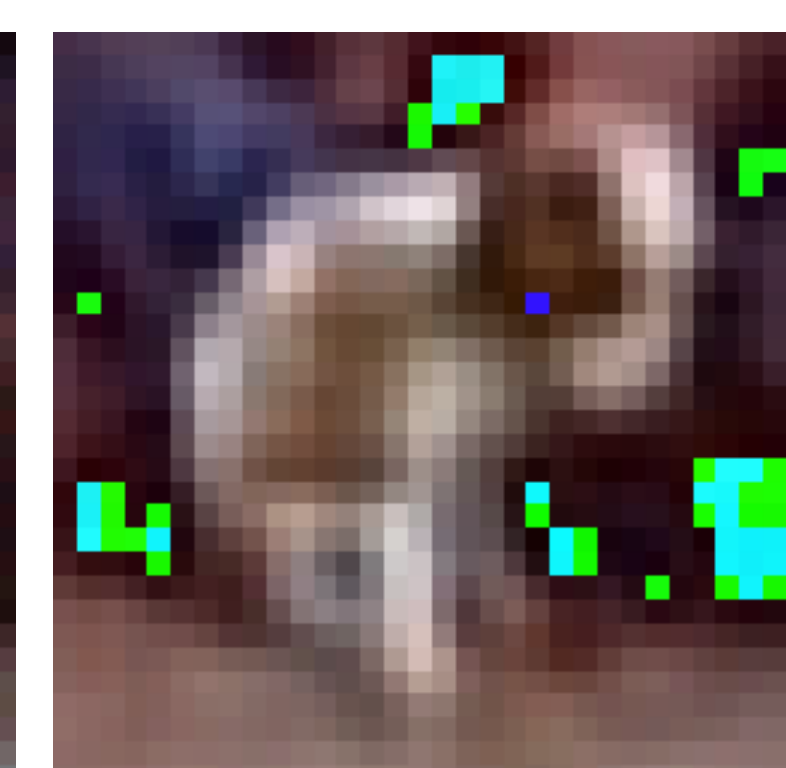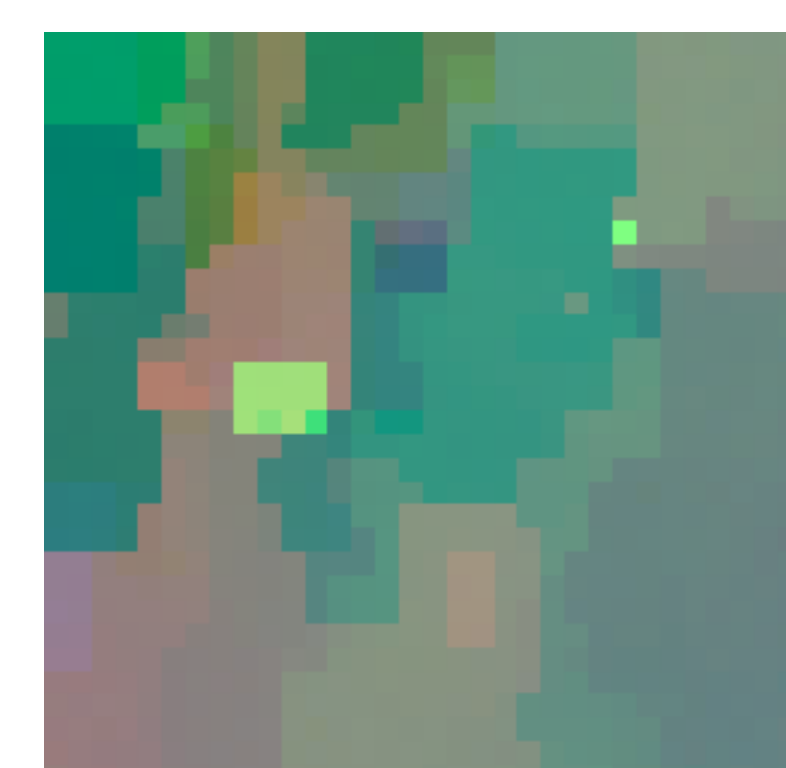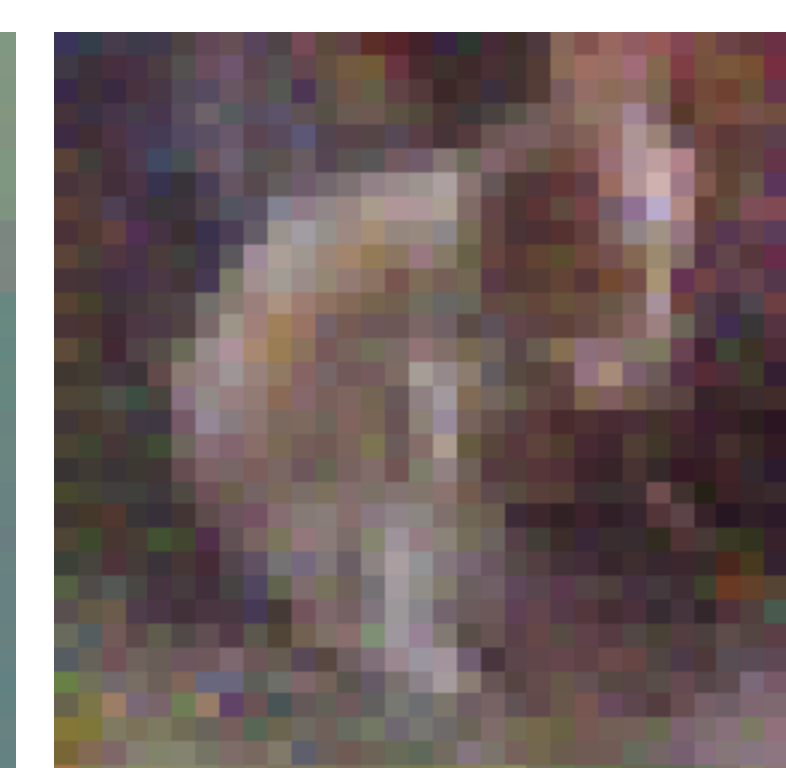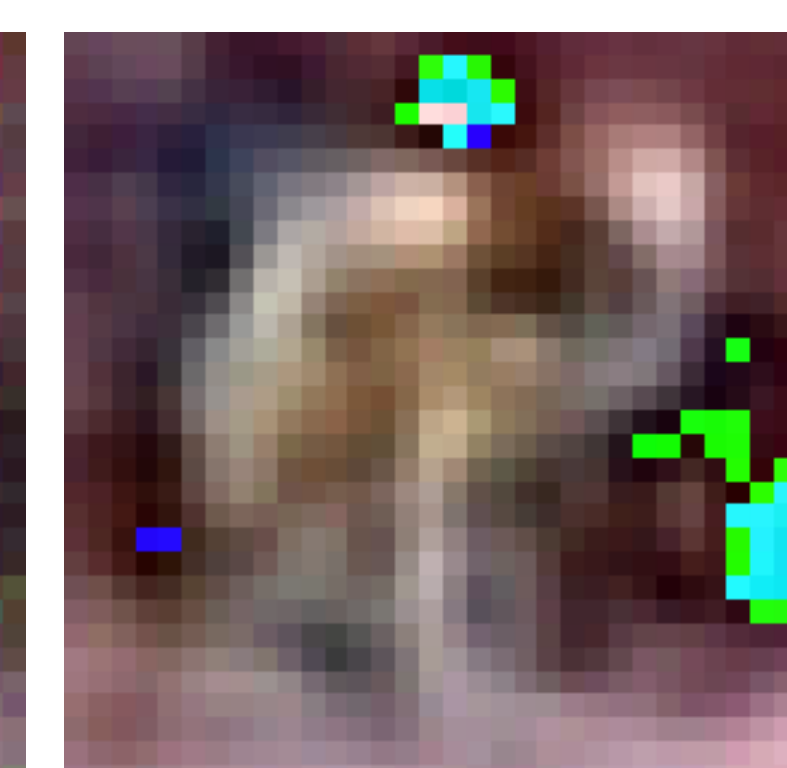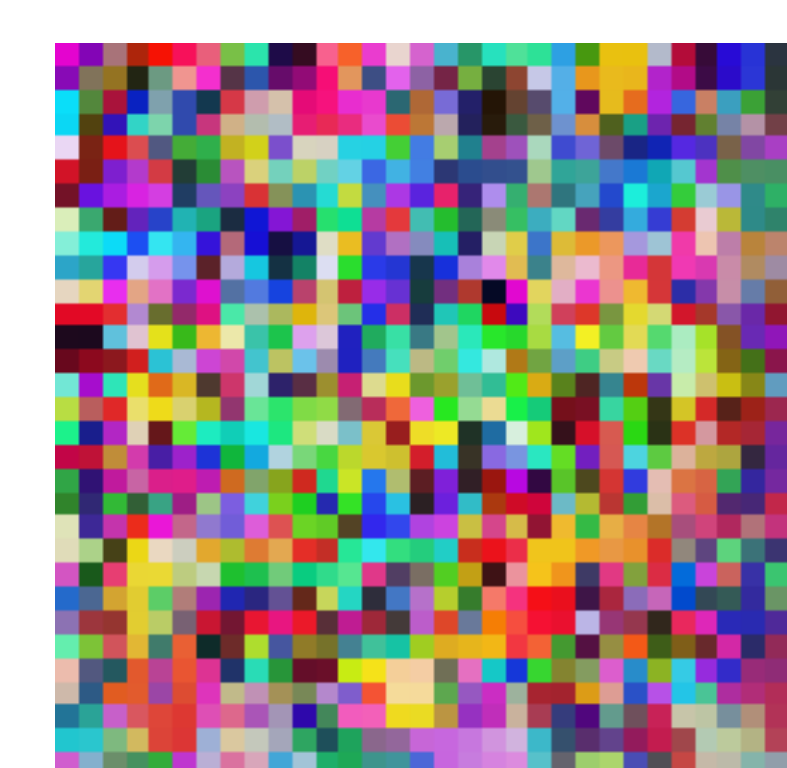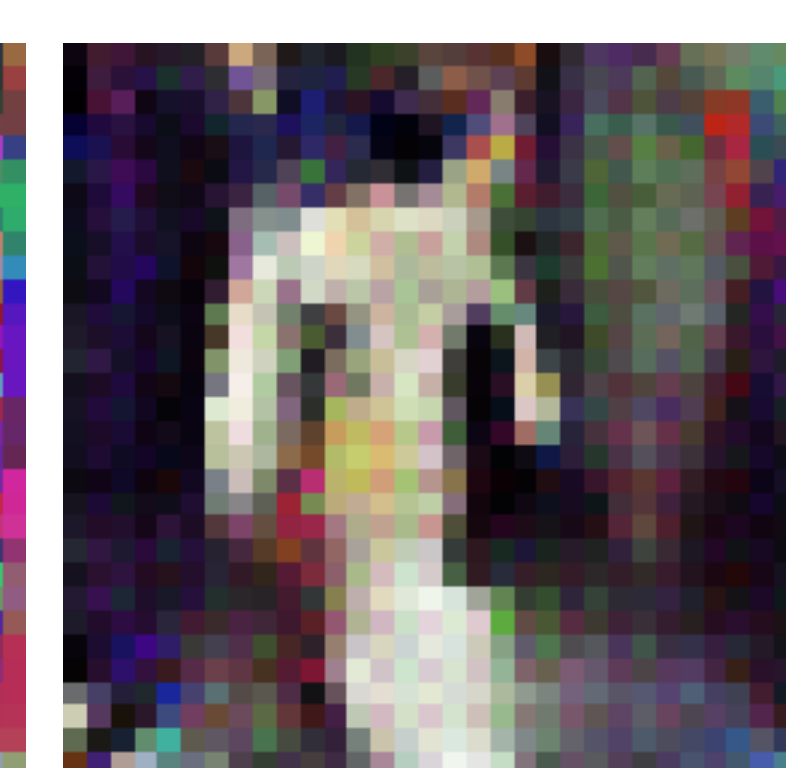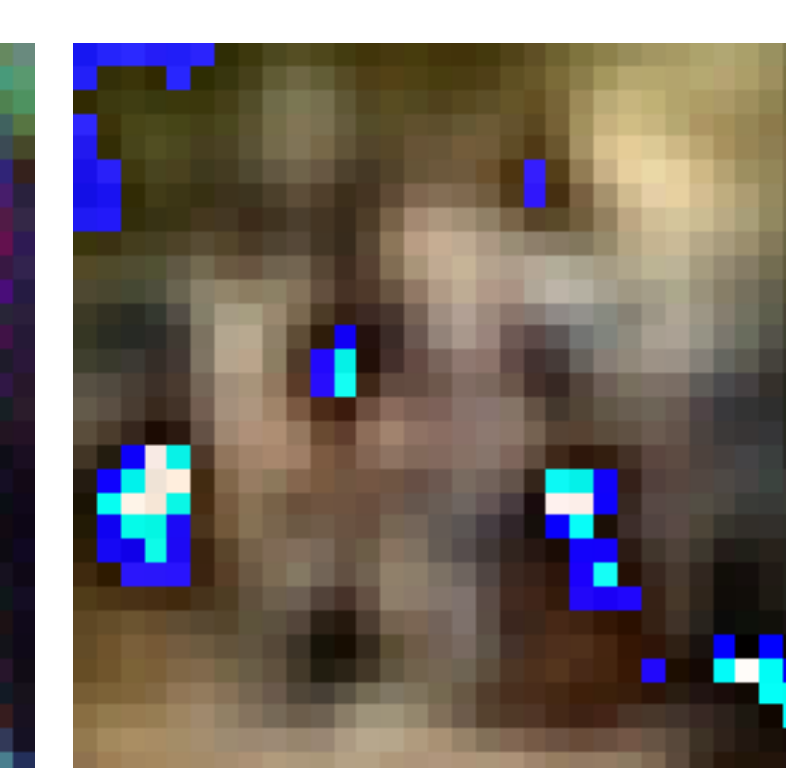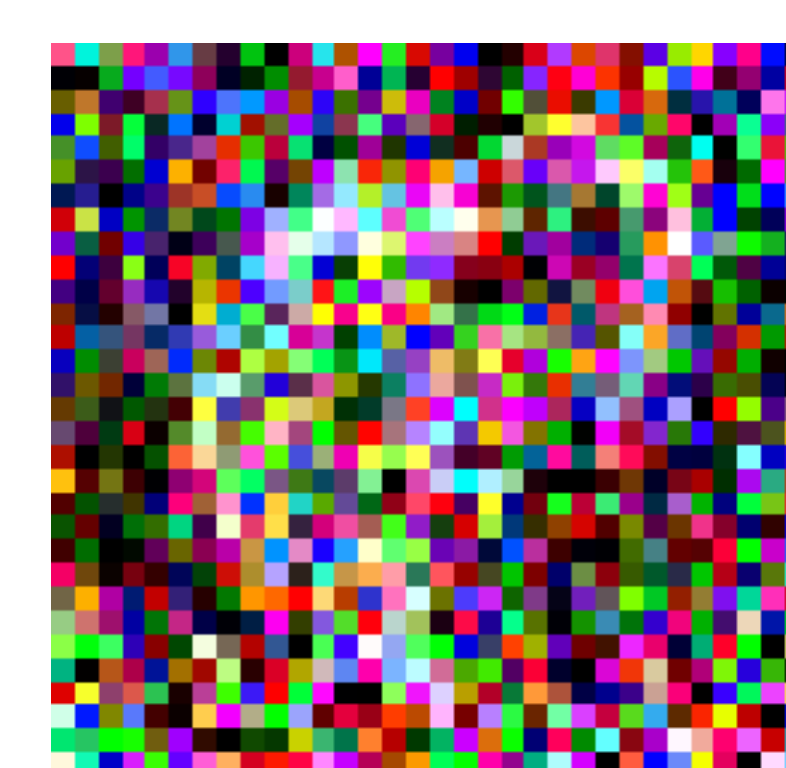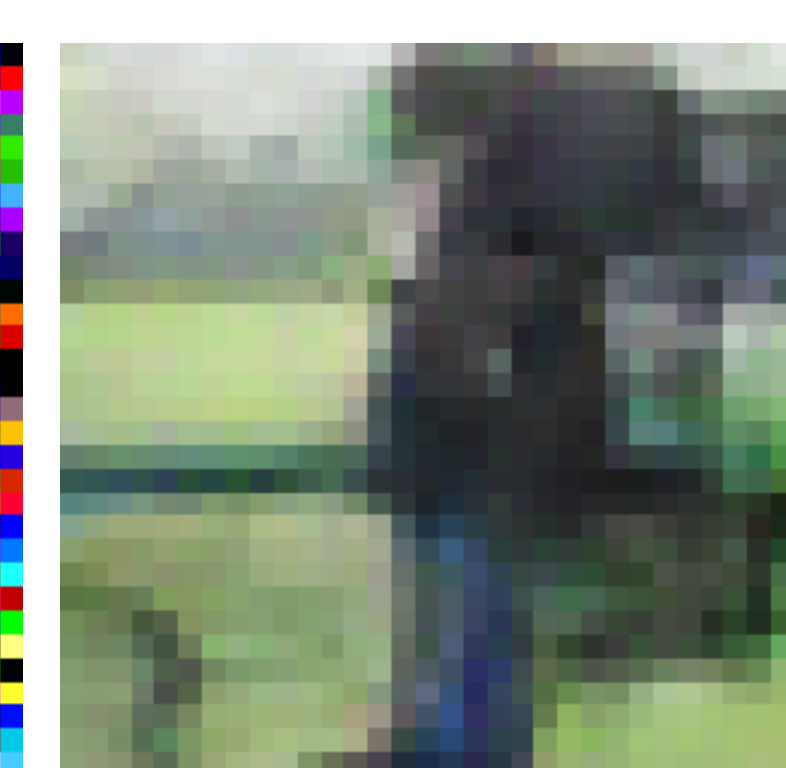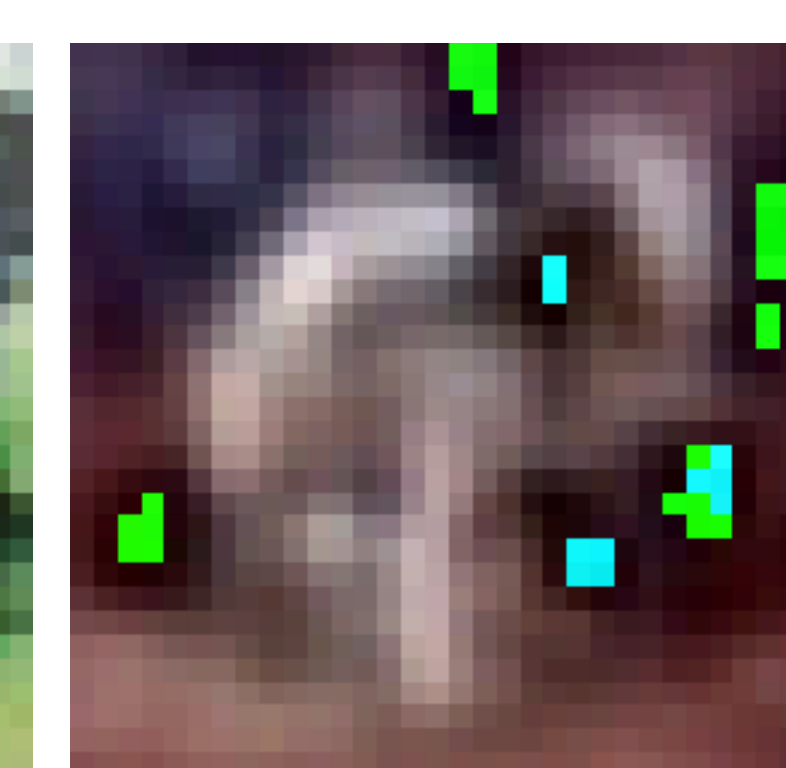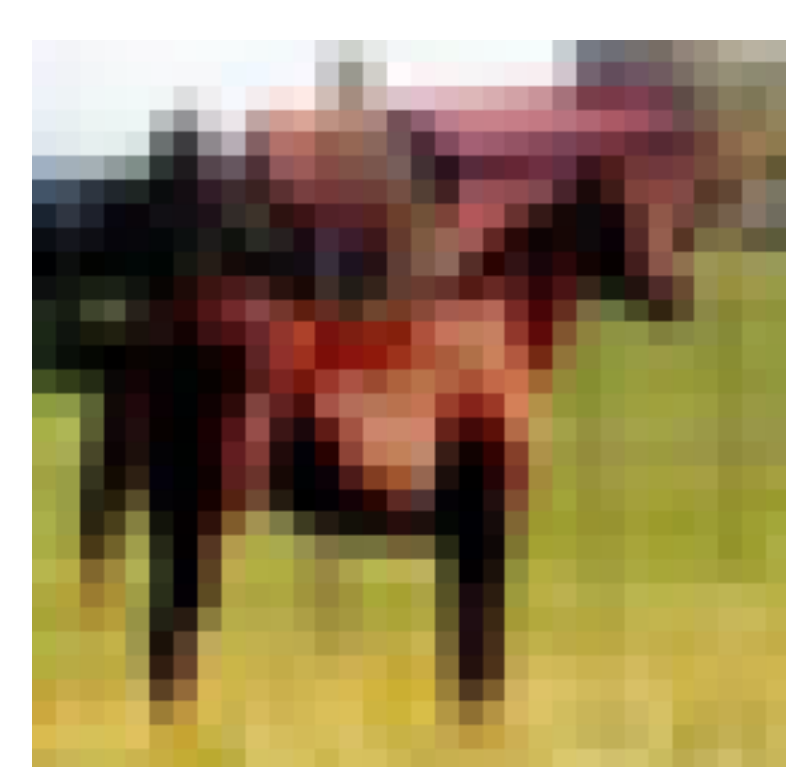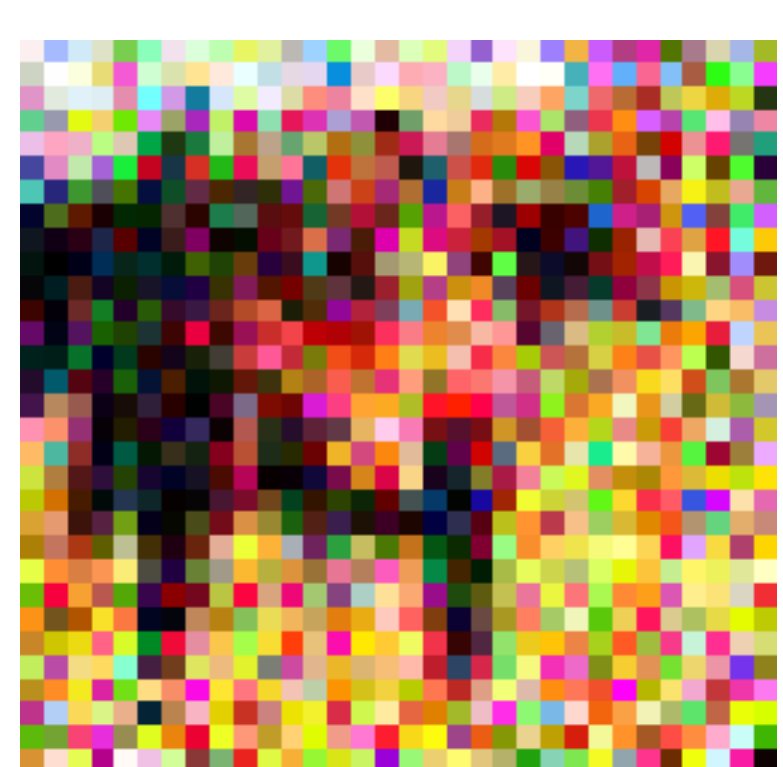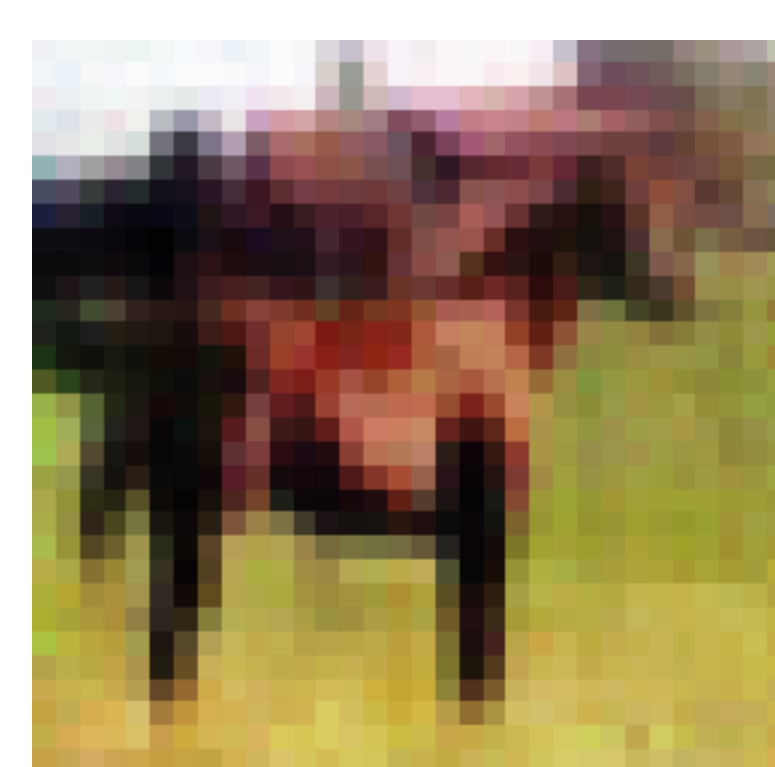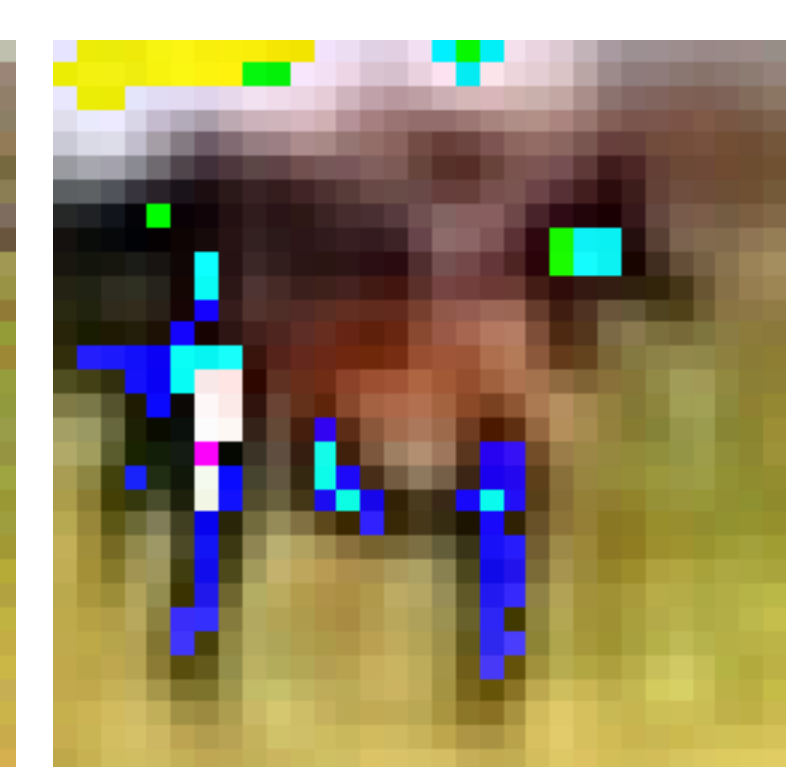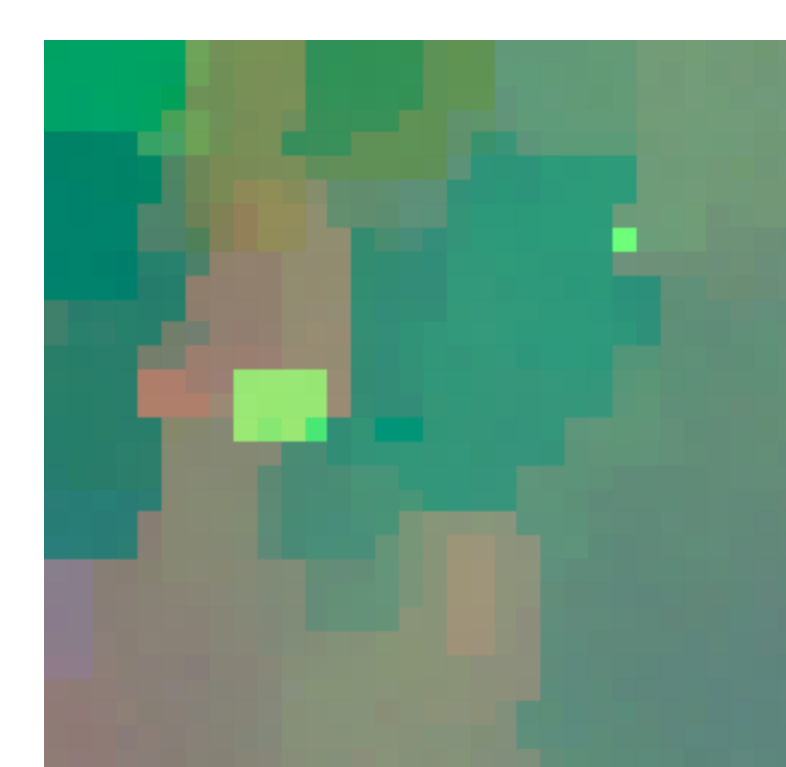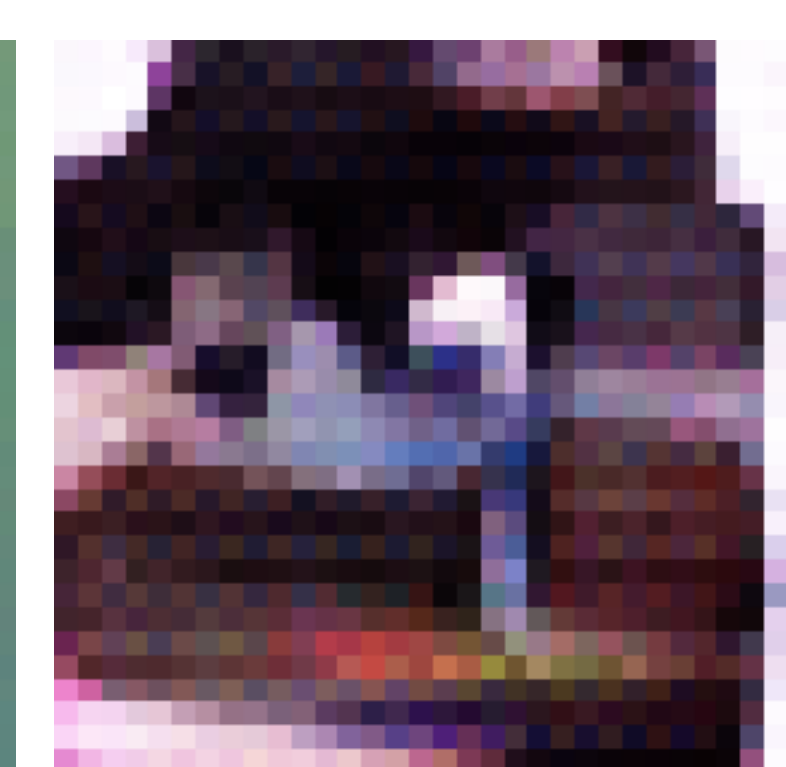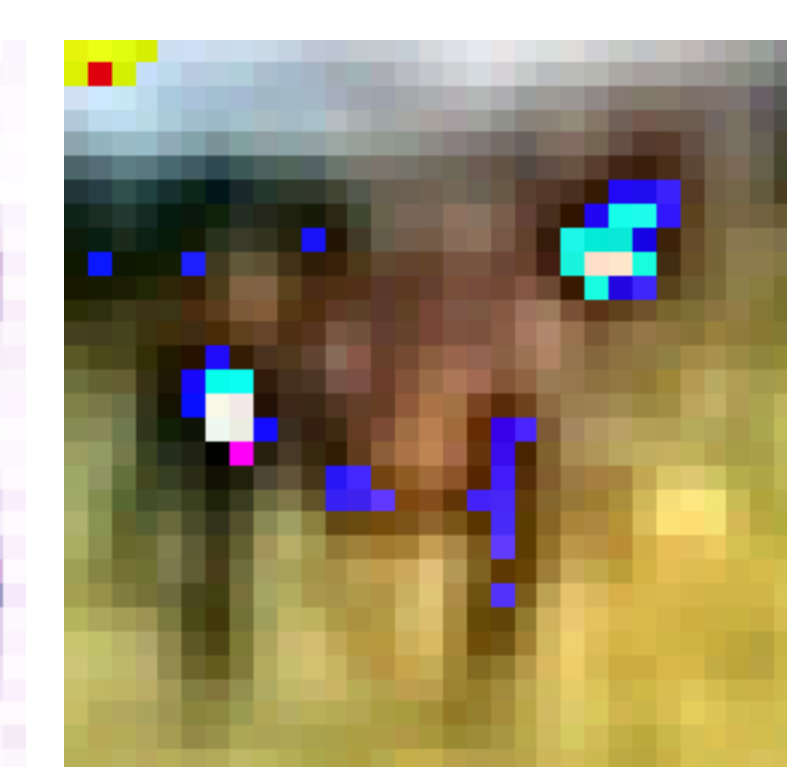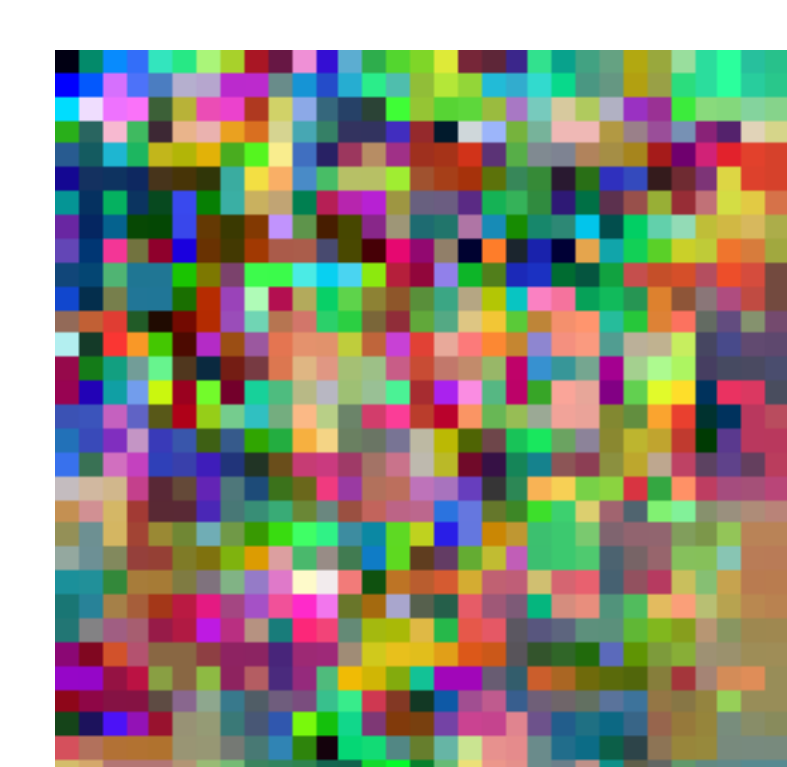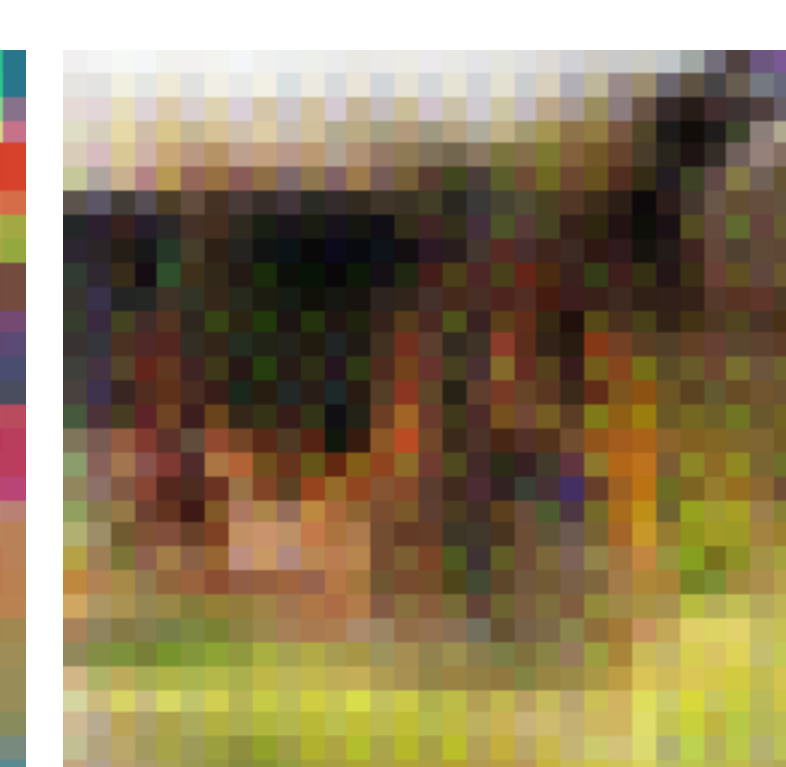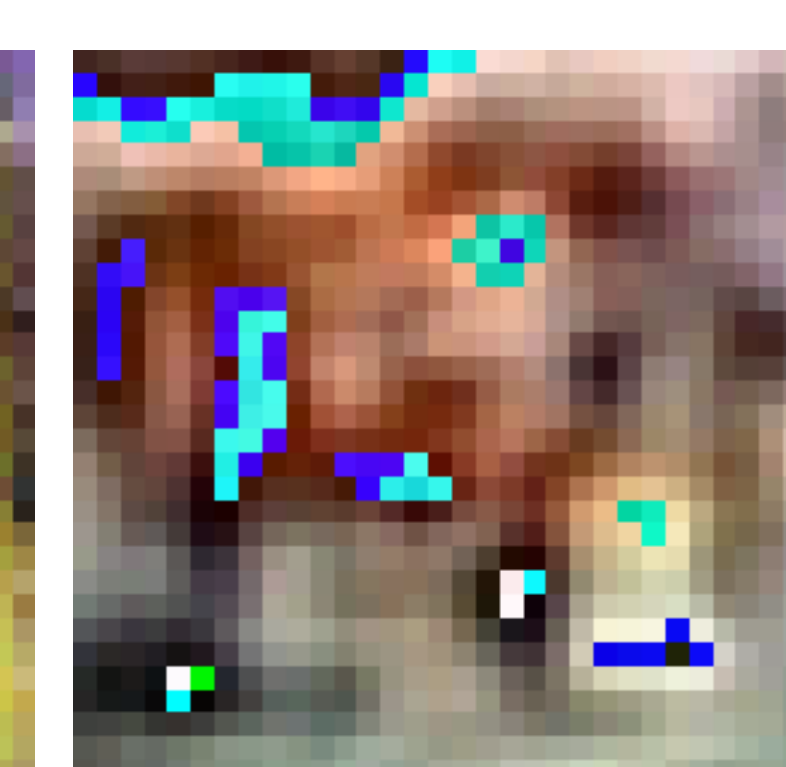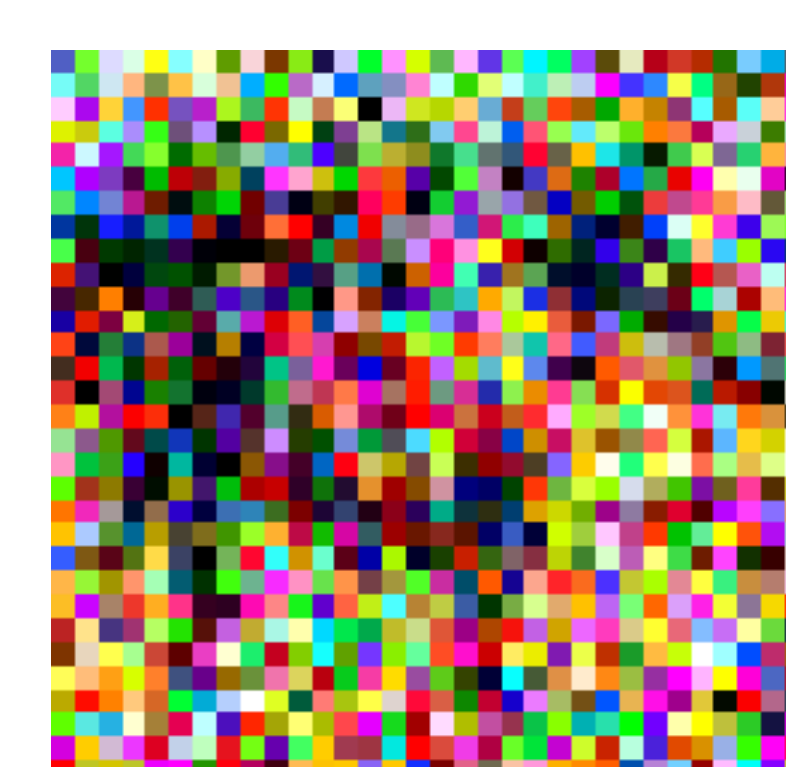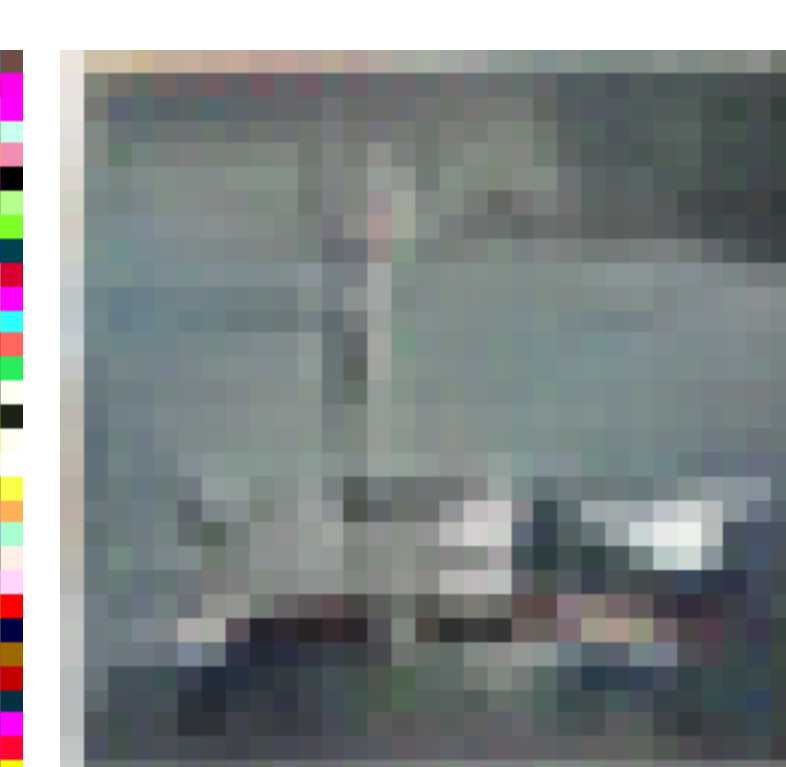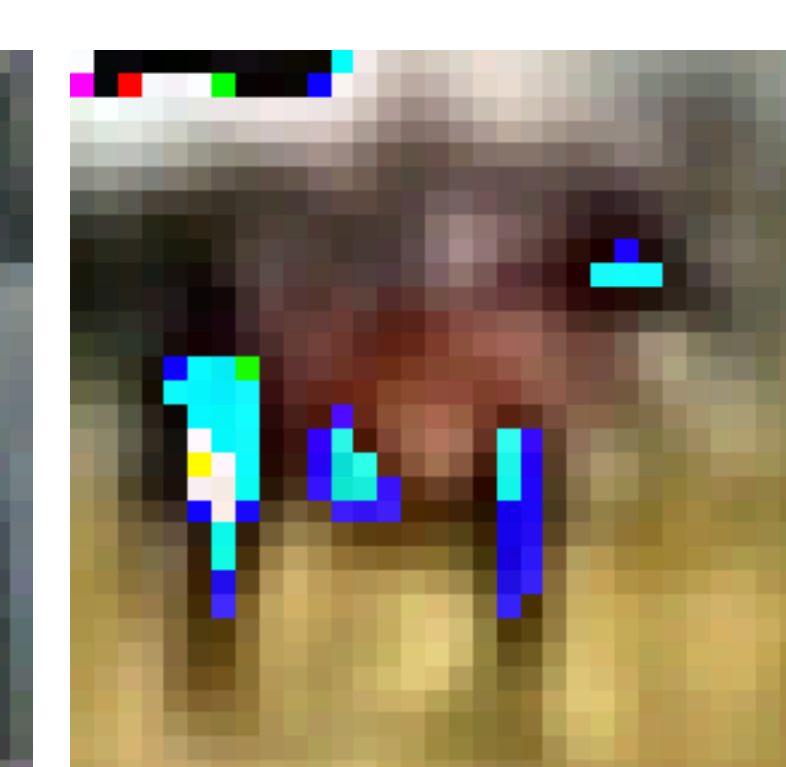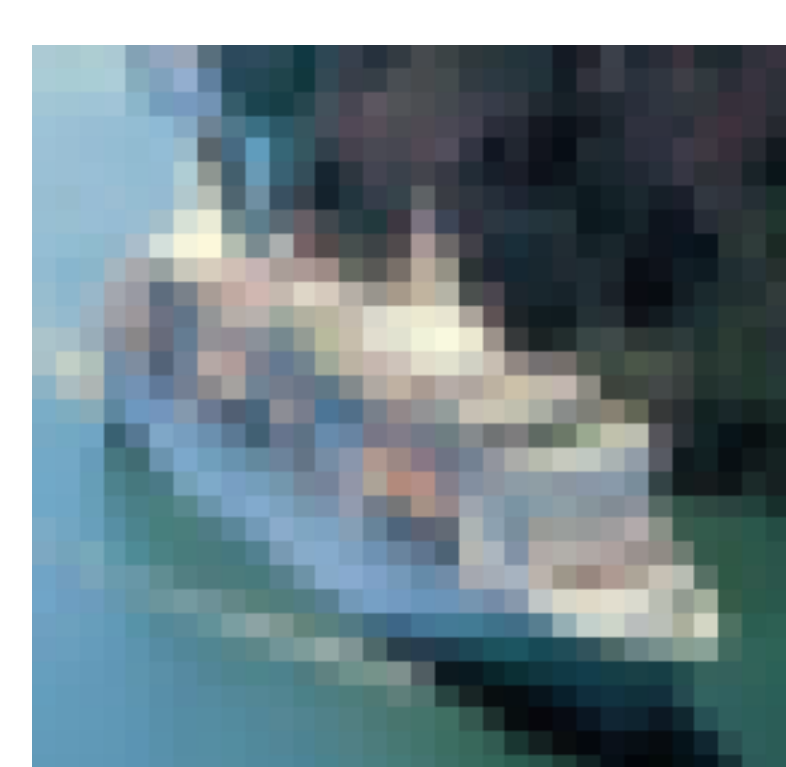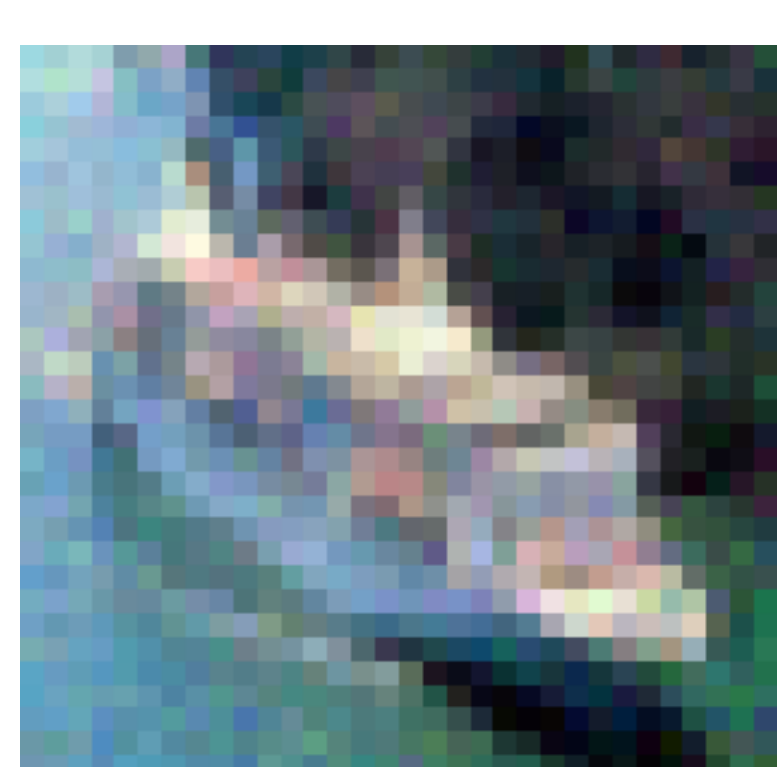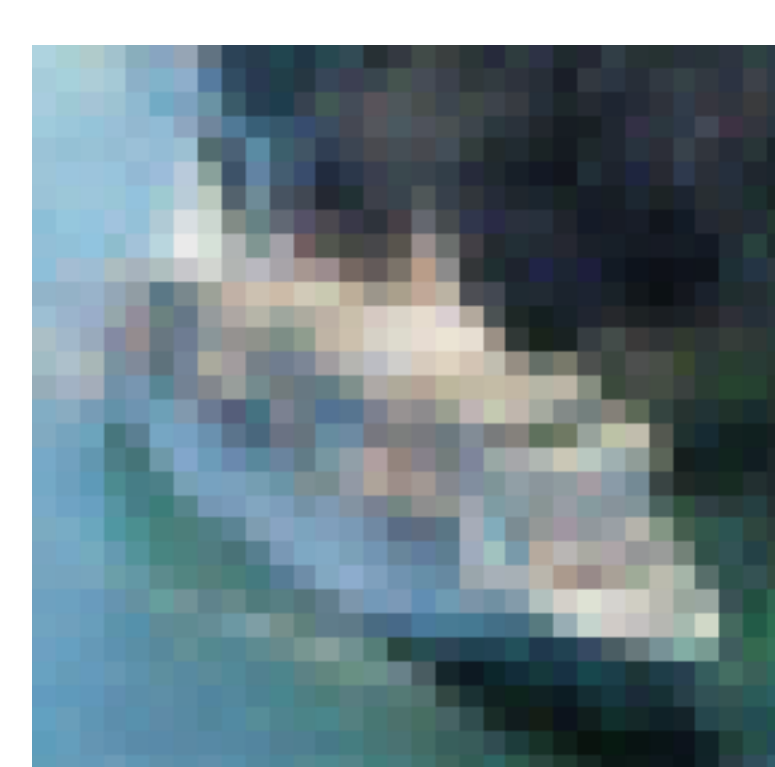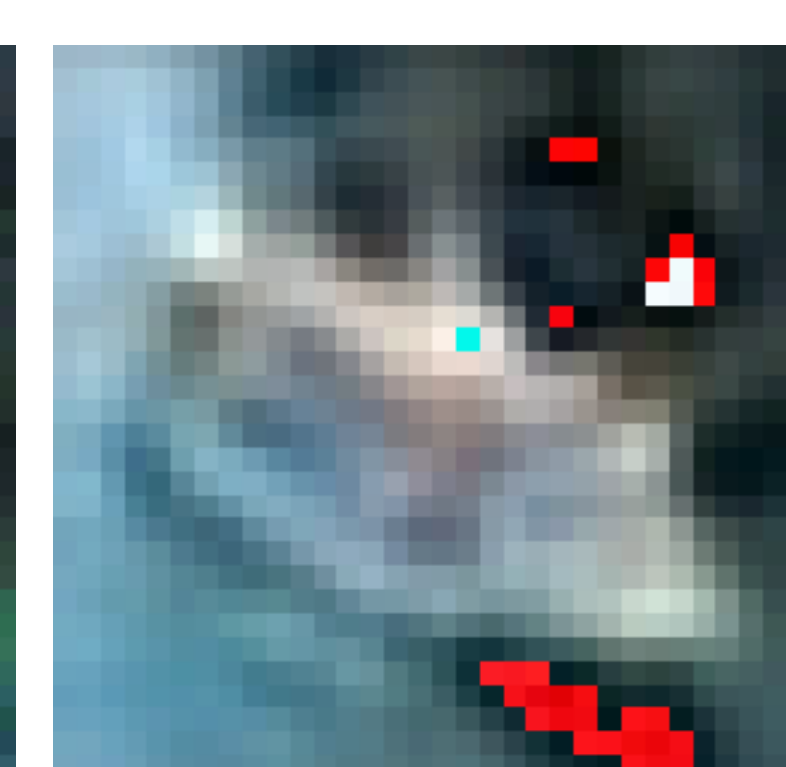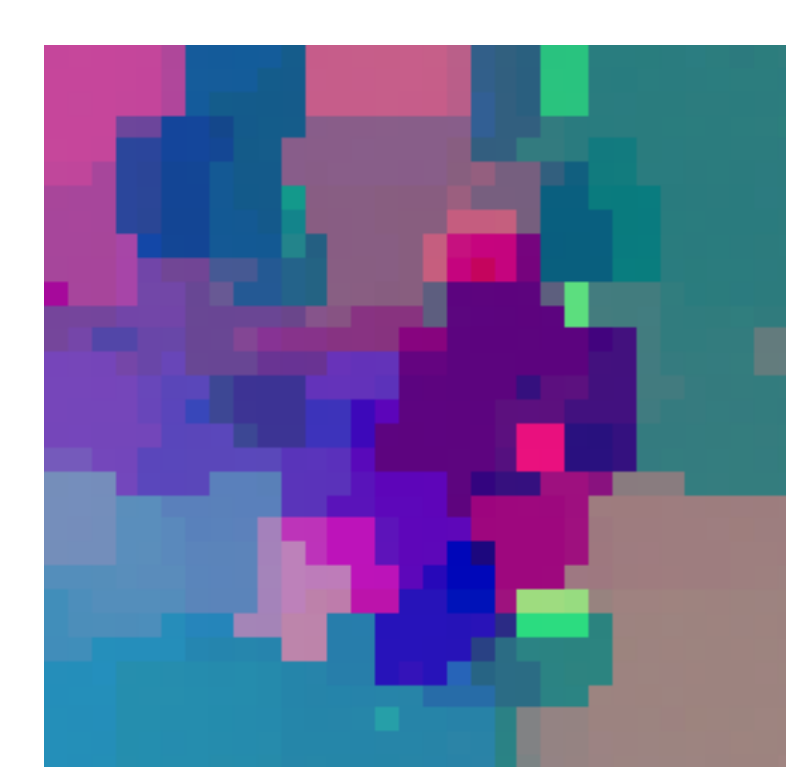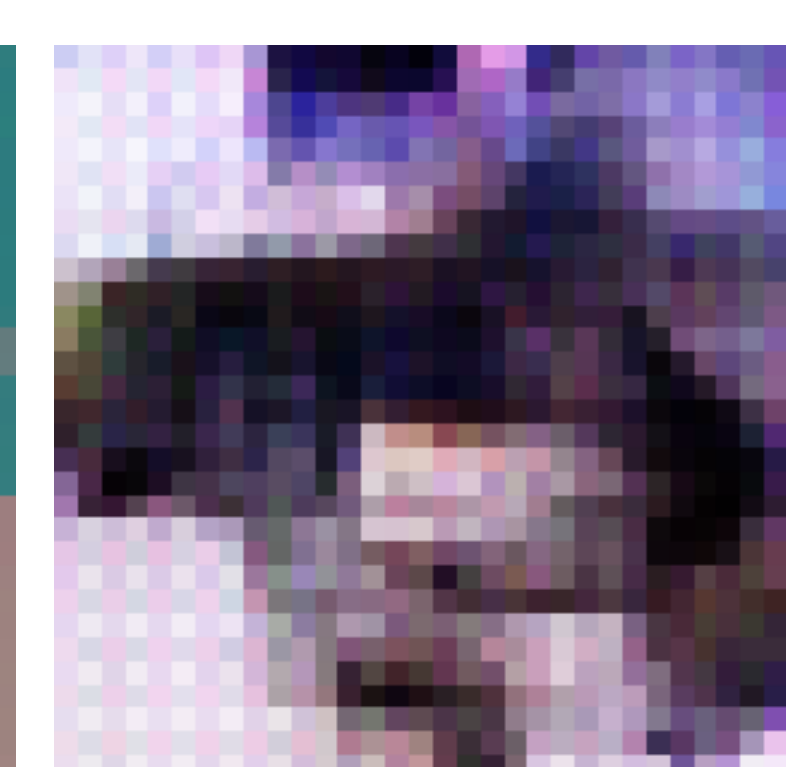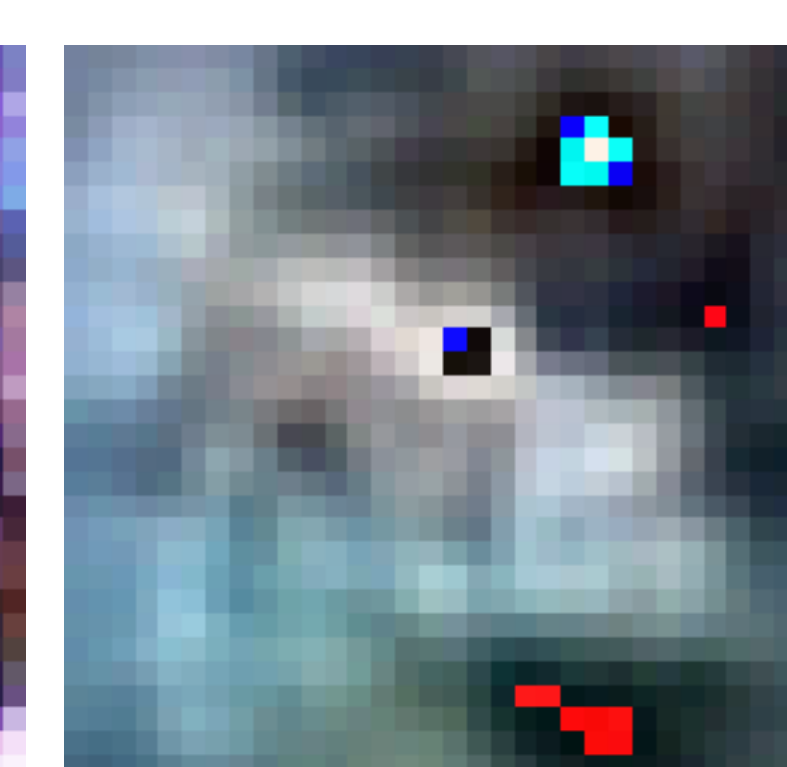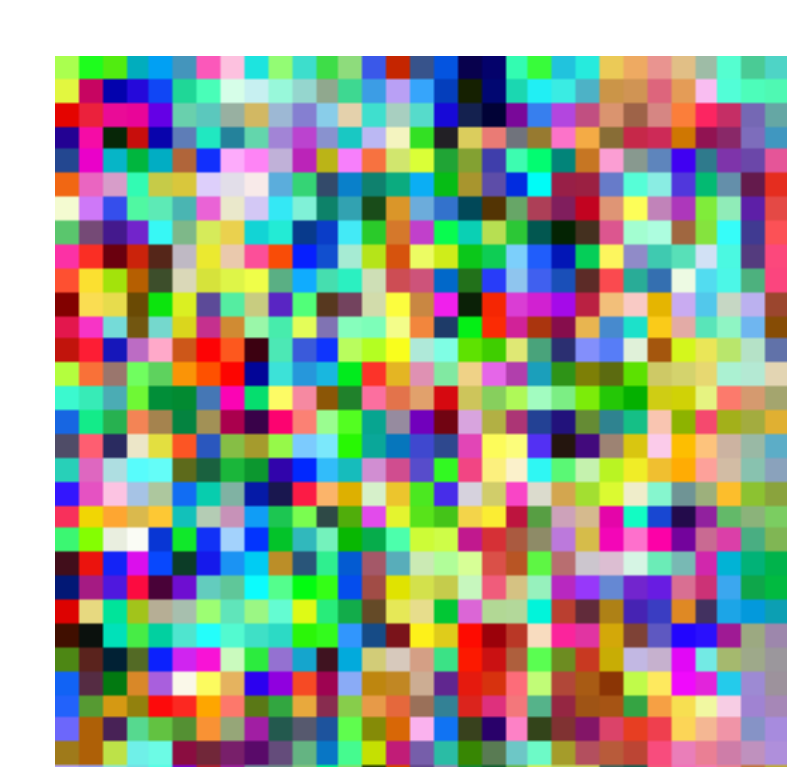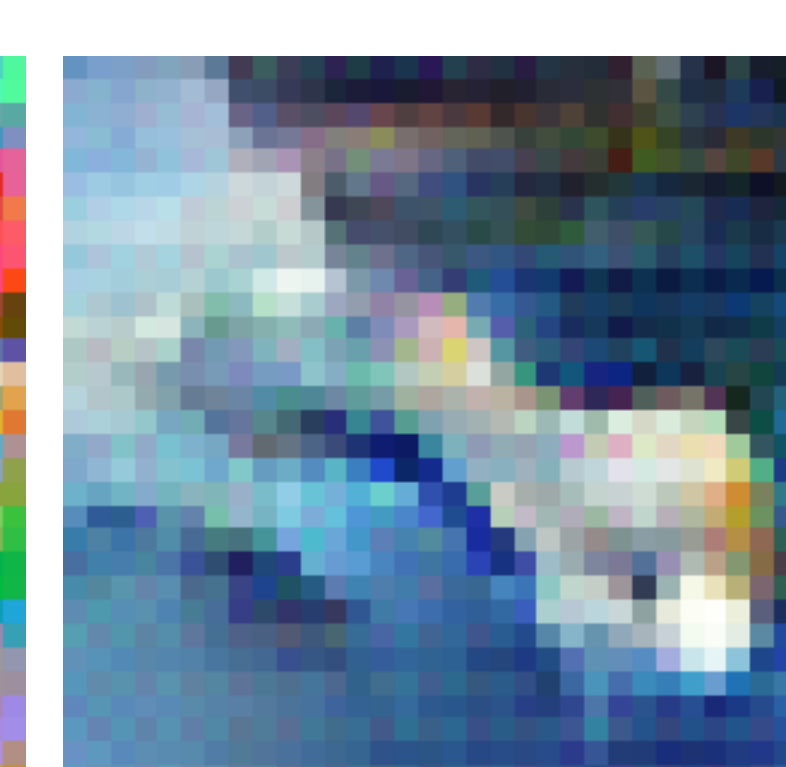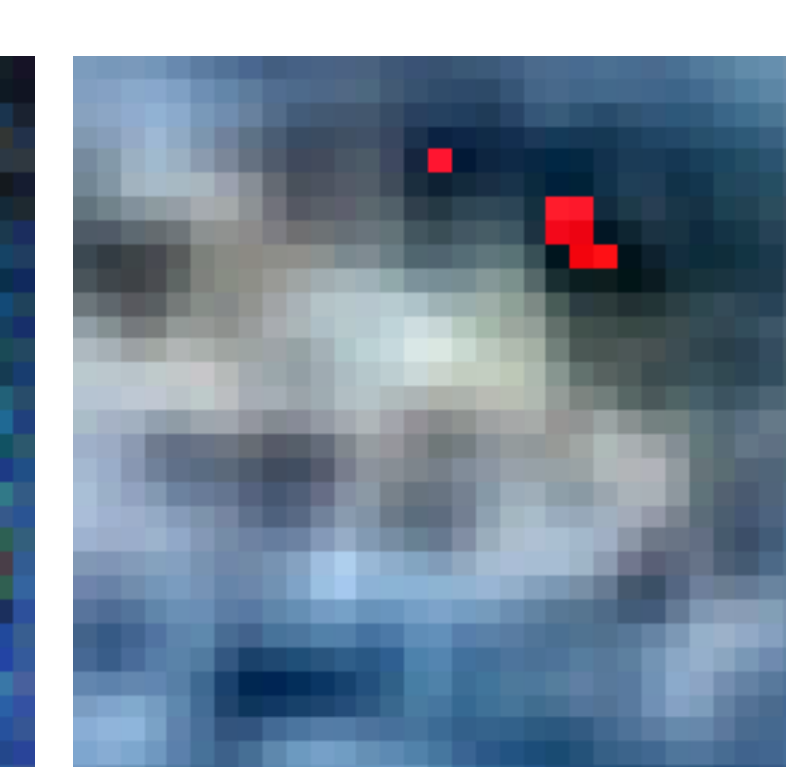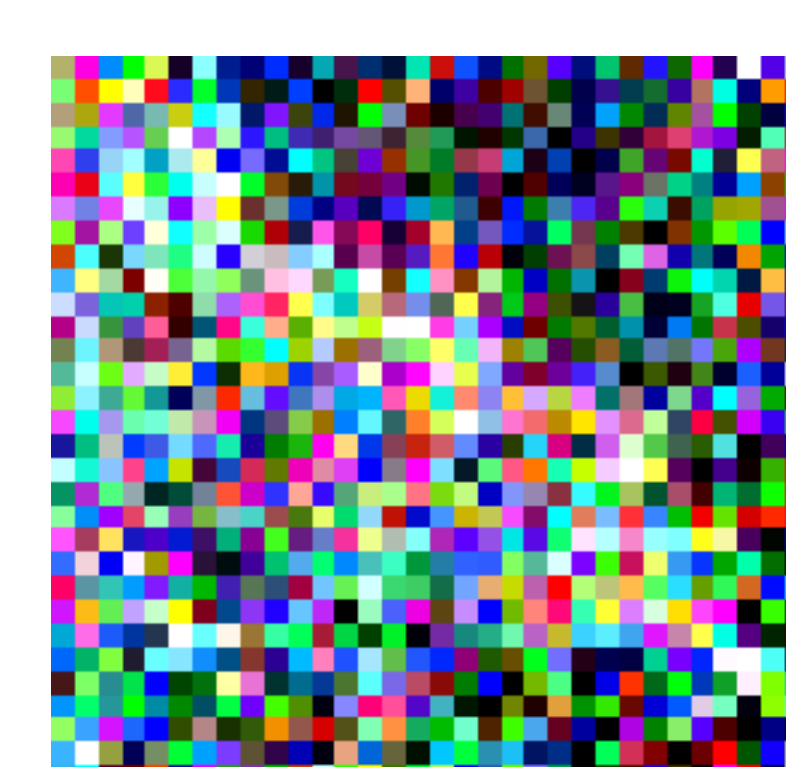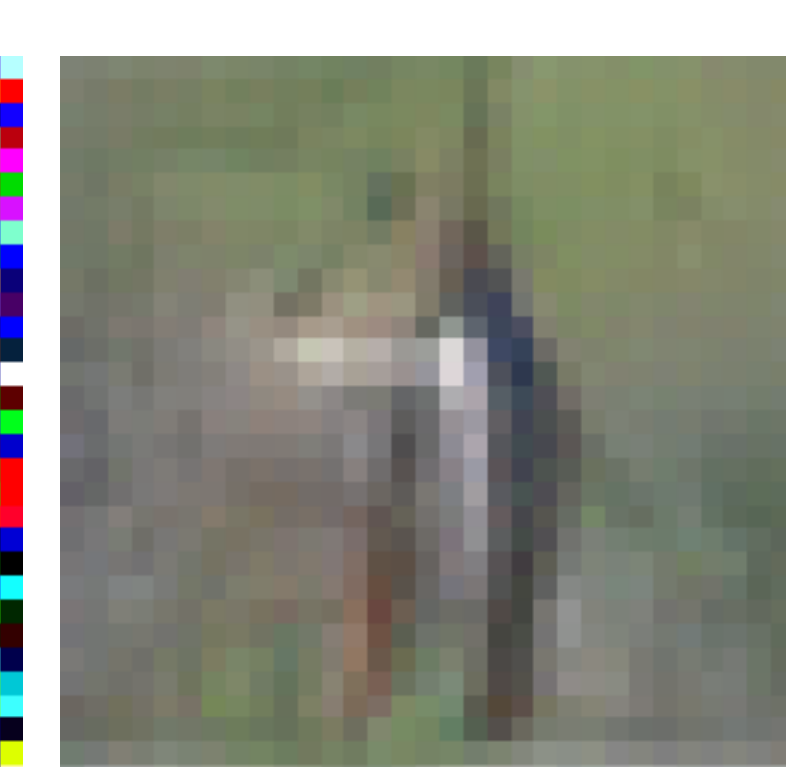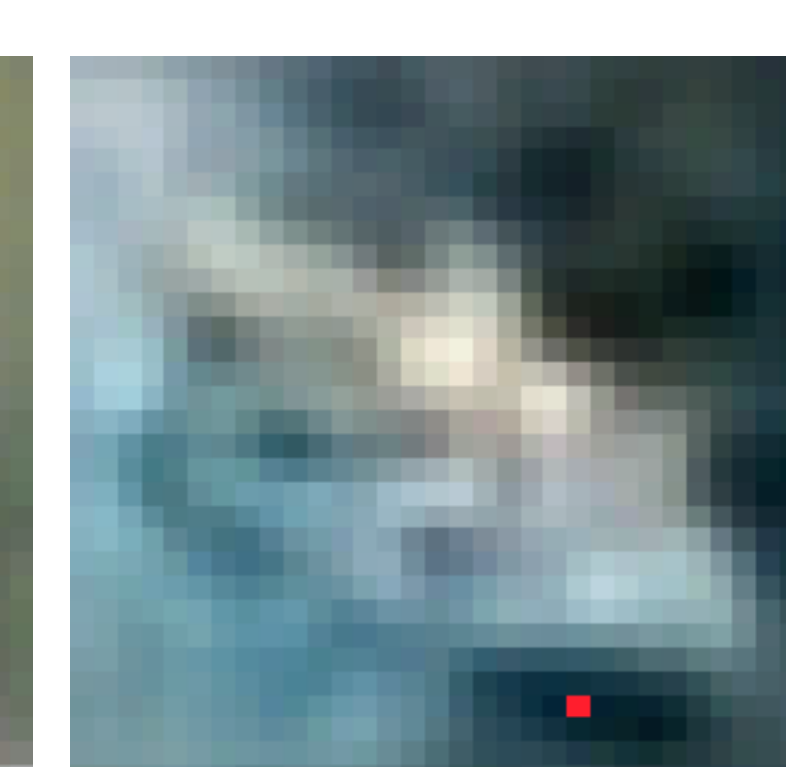Ground Truth  
Images

IG

GI-GIP

LTI

IG

GI-GIP

LTI

IG

GI-GIP

LTI

IG

GI-GIP

LTI
