# Supplementary material
Source: ML conference proceedings conference paper supplement (https://openreview.net/forum?id=Gt_GiNkBhu)

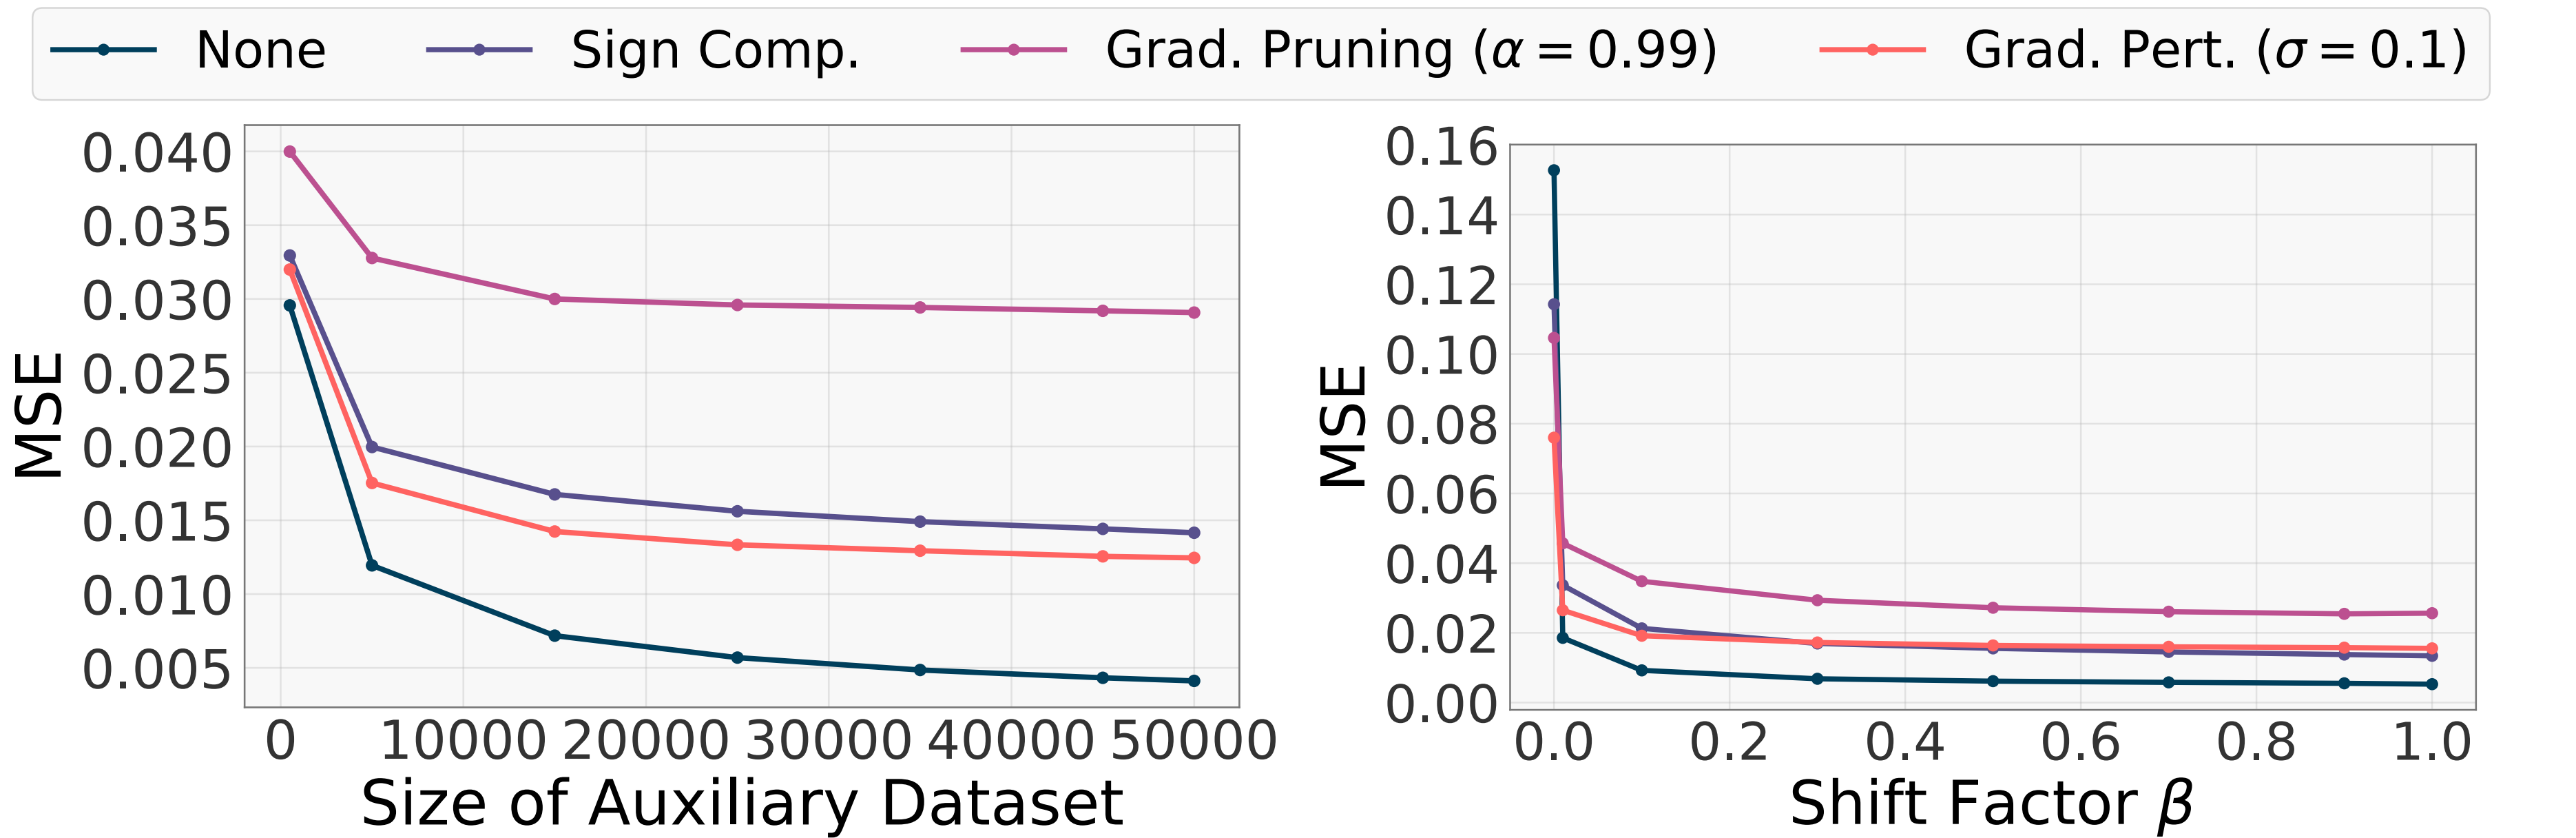

(a) Vary the size of auxiliary set

(b) Vary the distribution of auxiliary set

Supplement: supplementary_material [file attachment]

**Learning To Invert (LTI)**

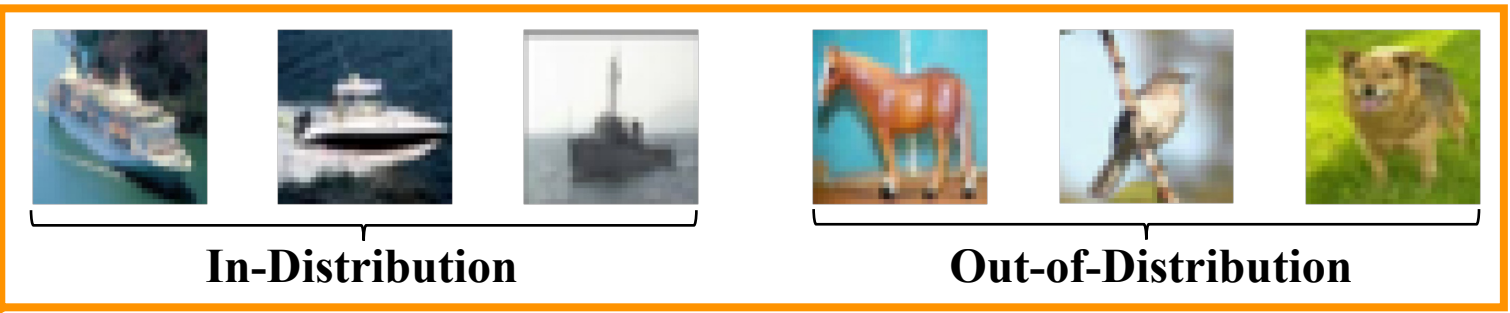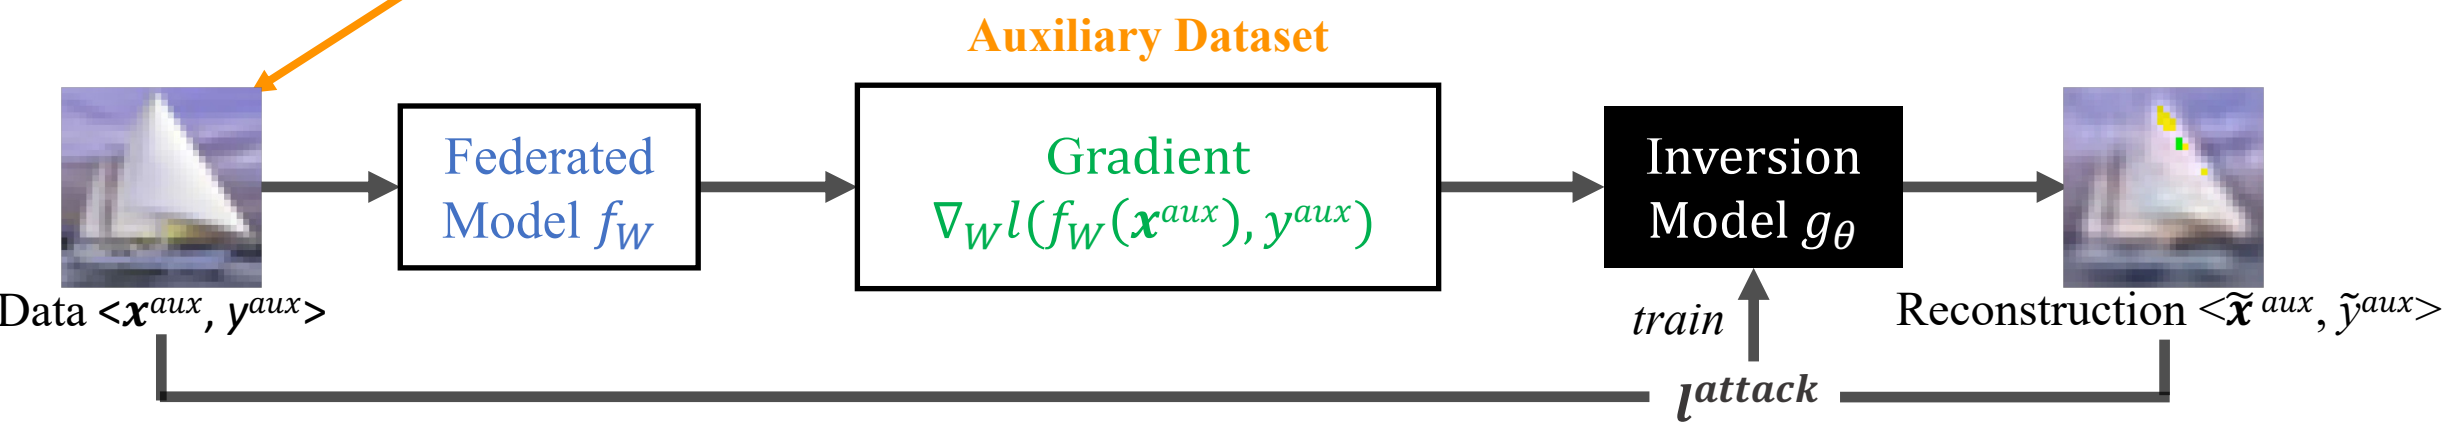

**Federated Learning**

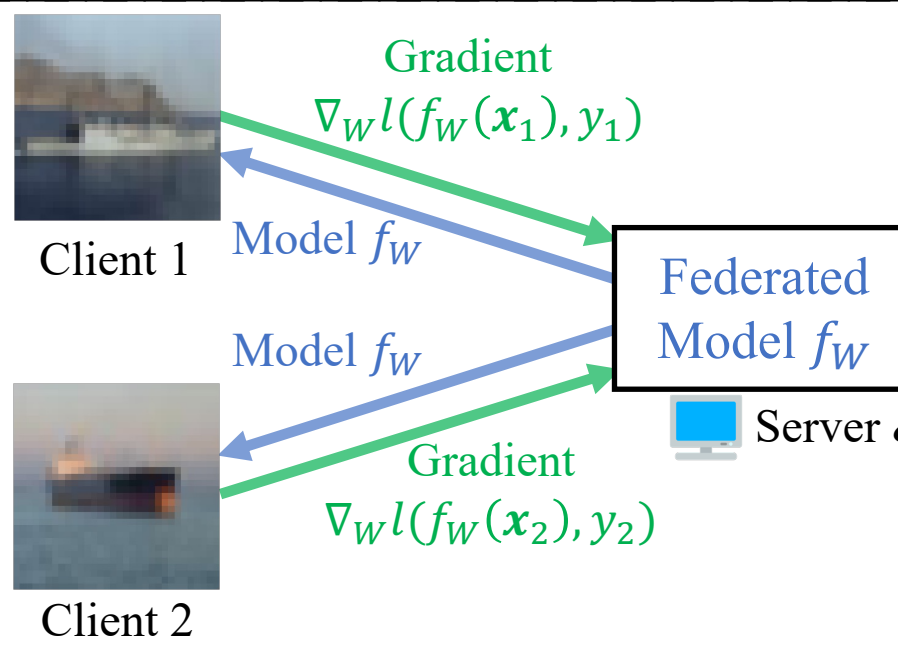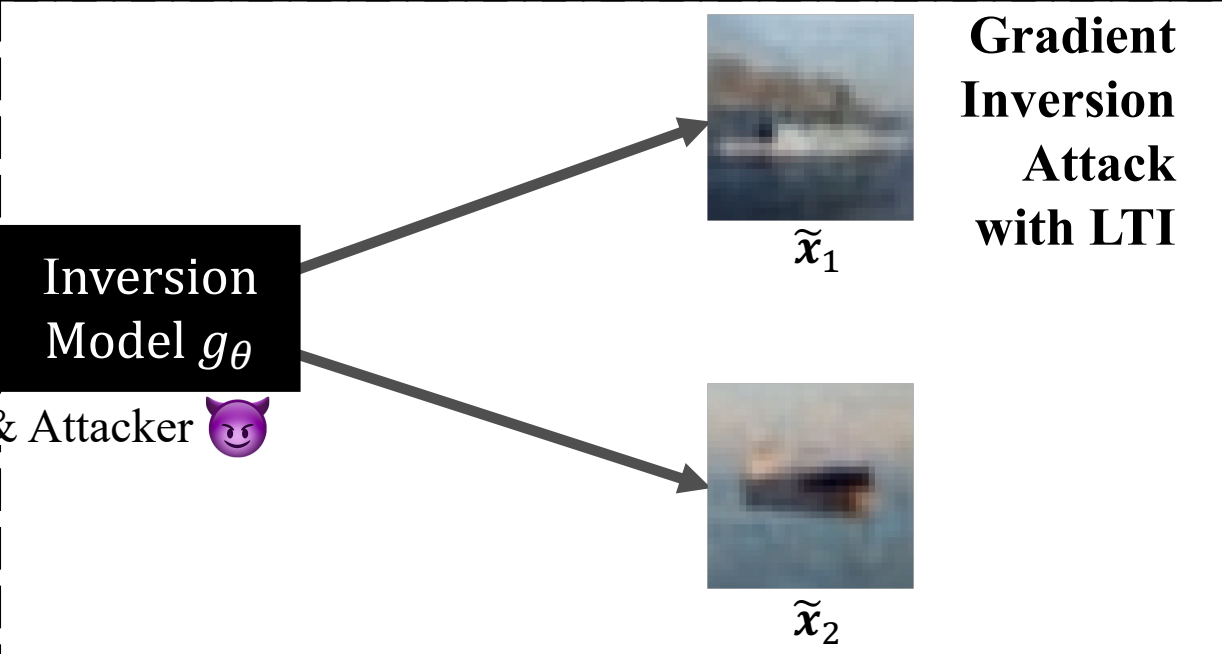

Supplement: supplementary_material [file attachment]

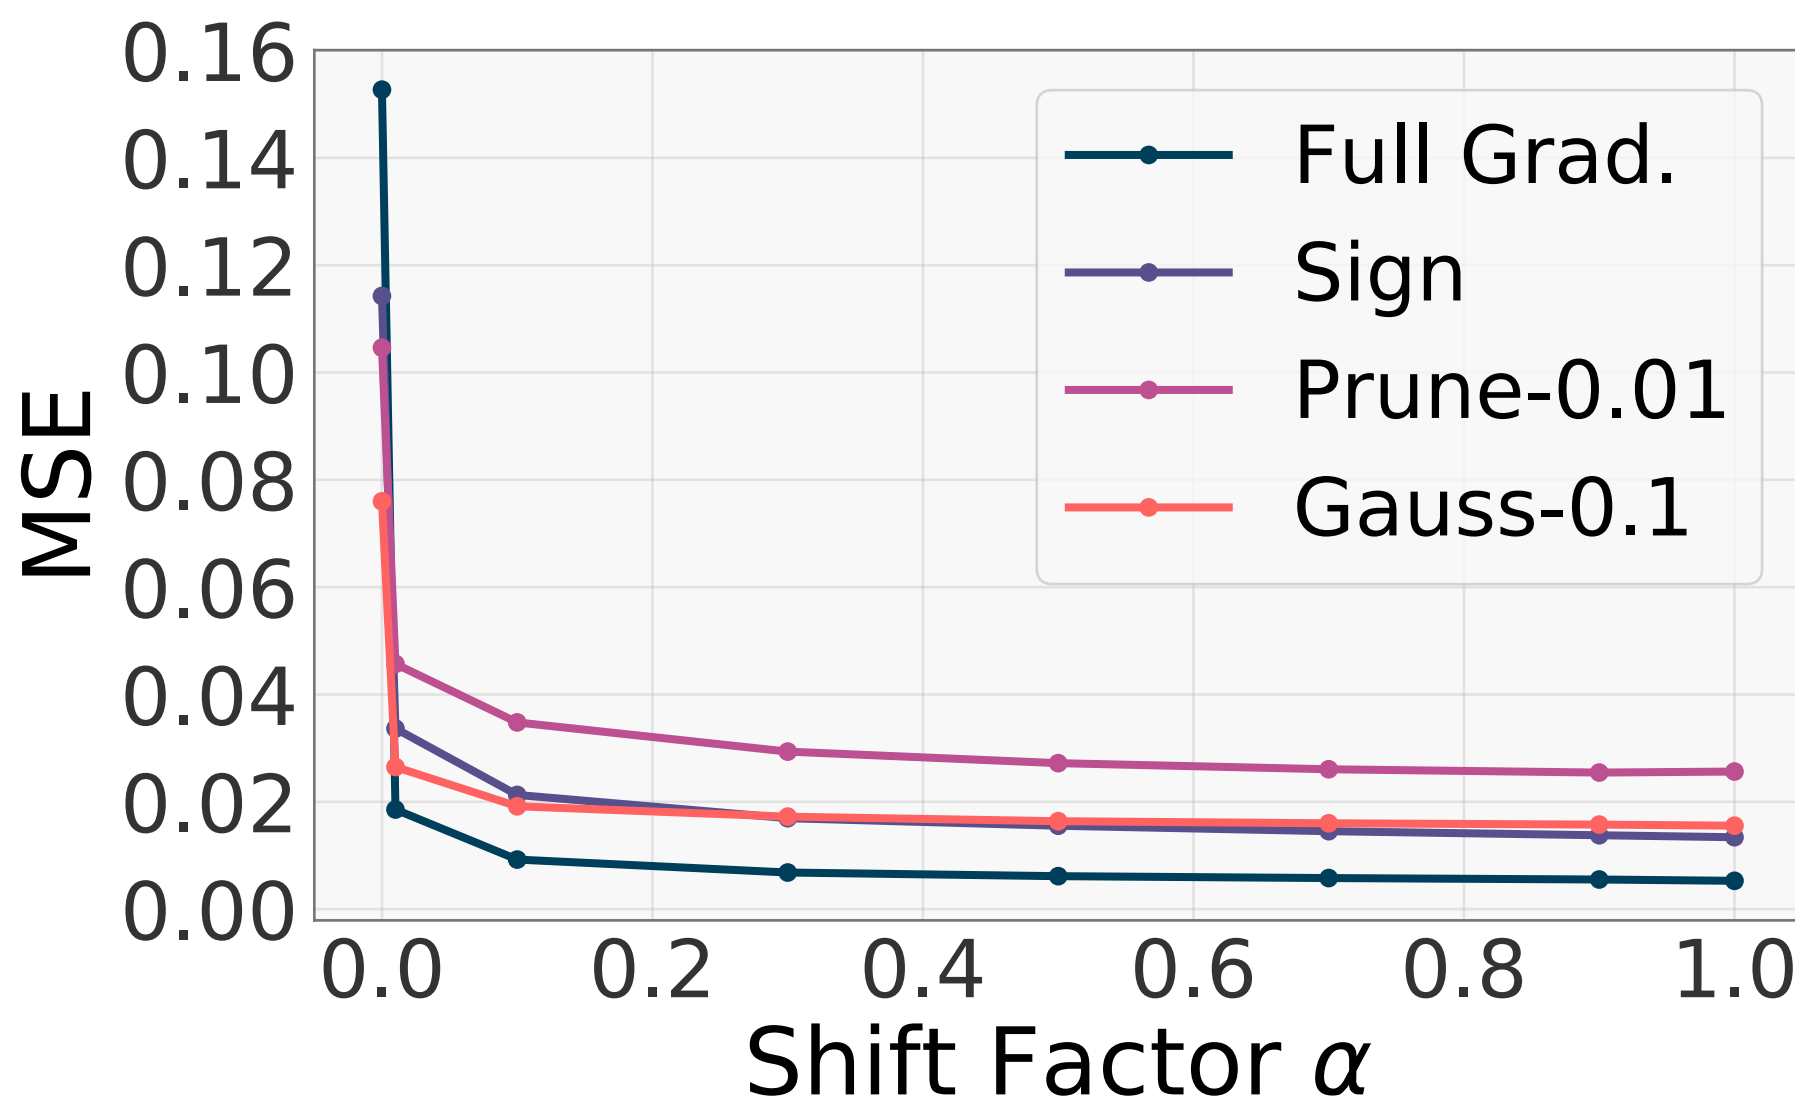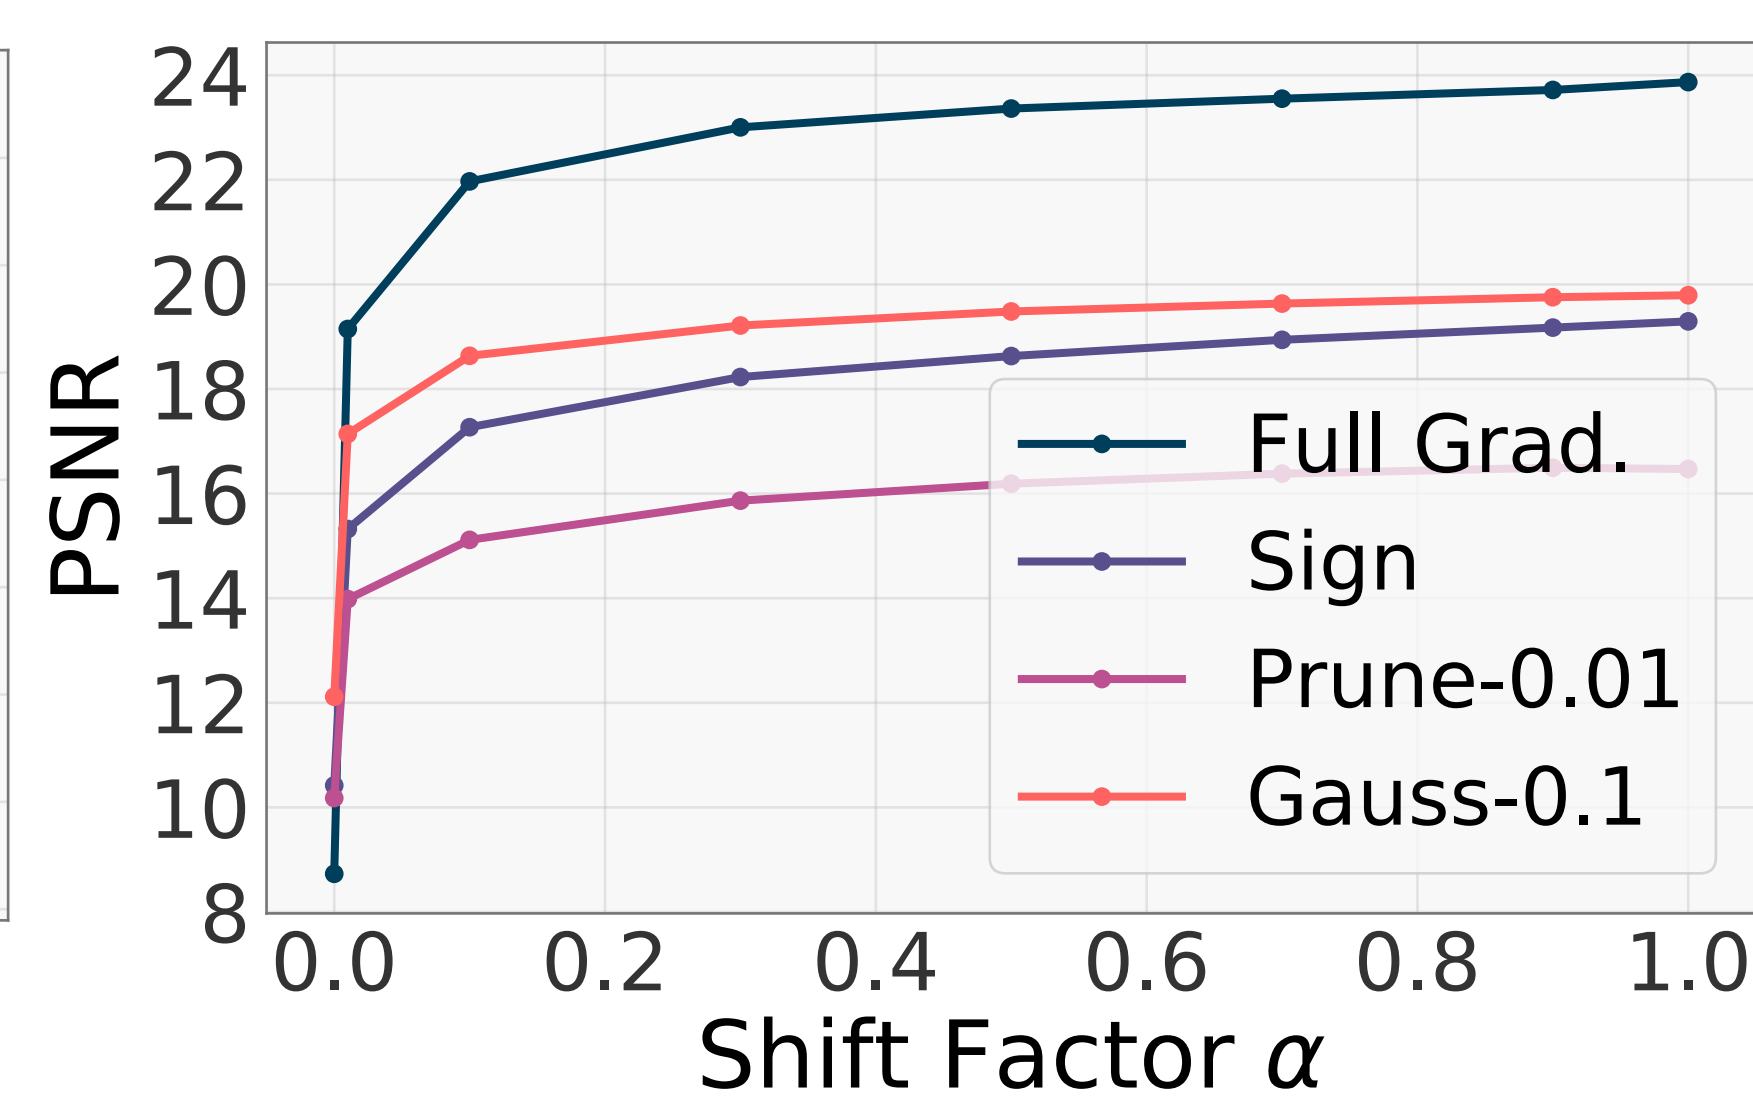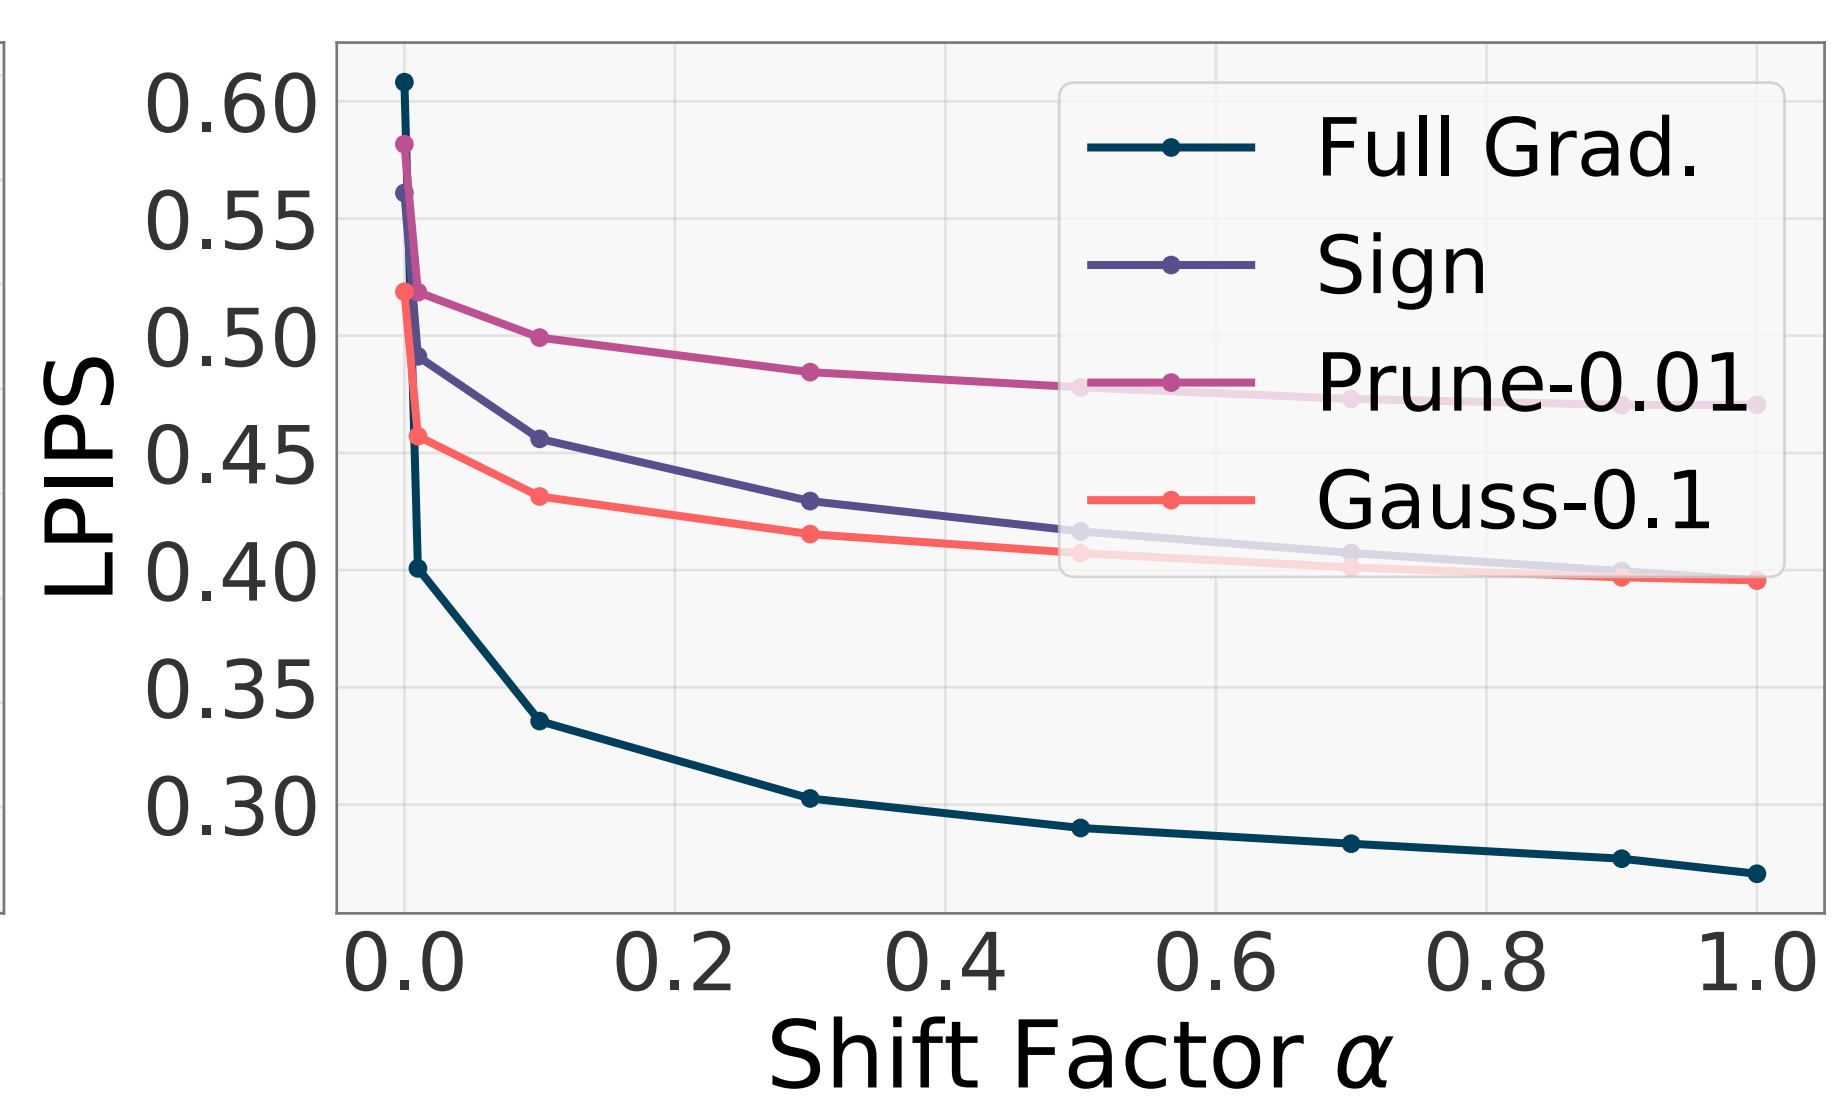

Supplement: supplementary_material [file attachment]

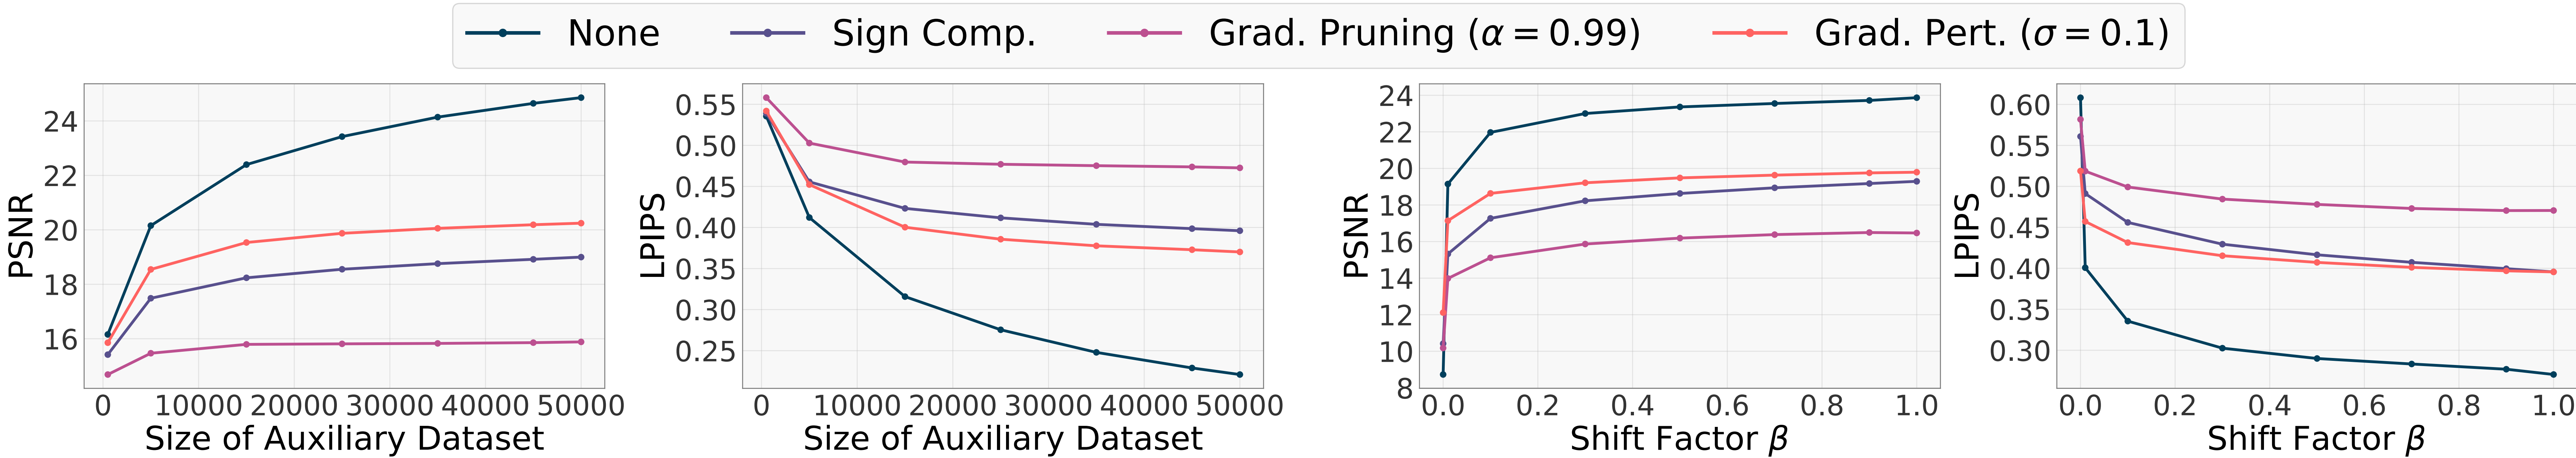

(a) Vary the size of auxiliary set

(b) Vary the distribution of auxiliary set

Supplement: supplementary_material [file attachment]

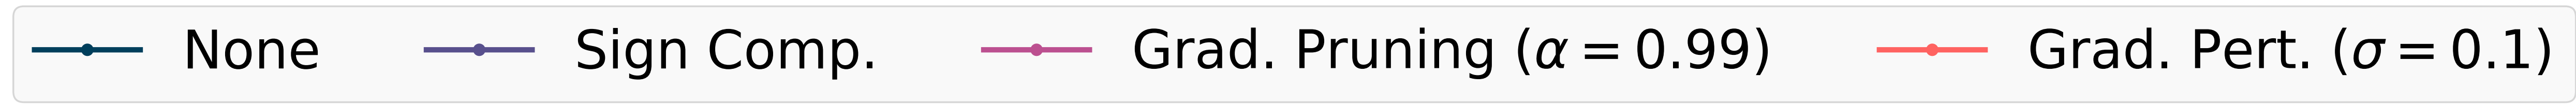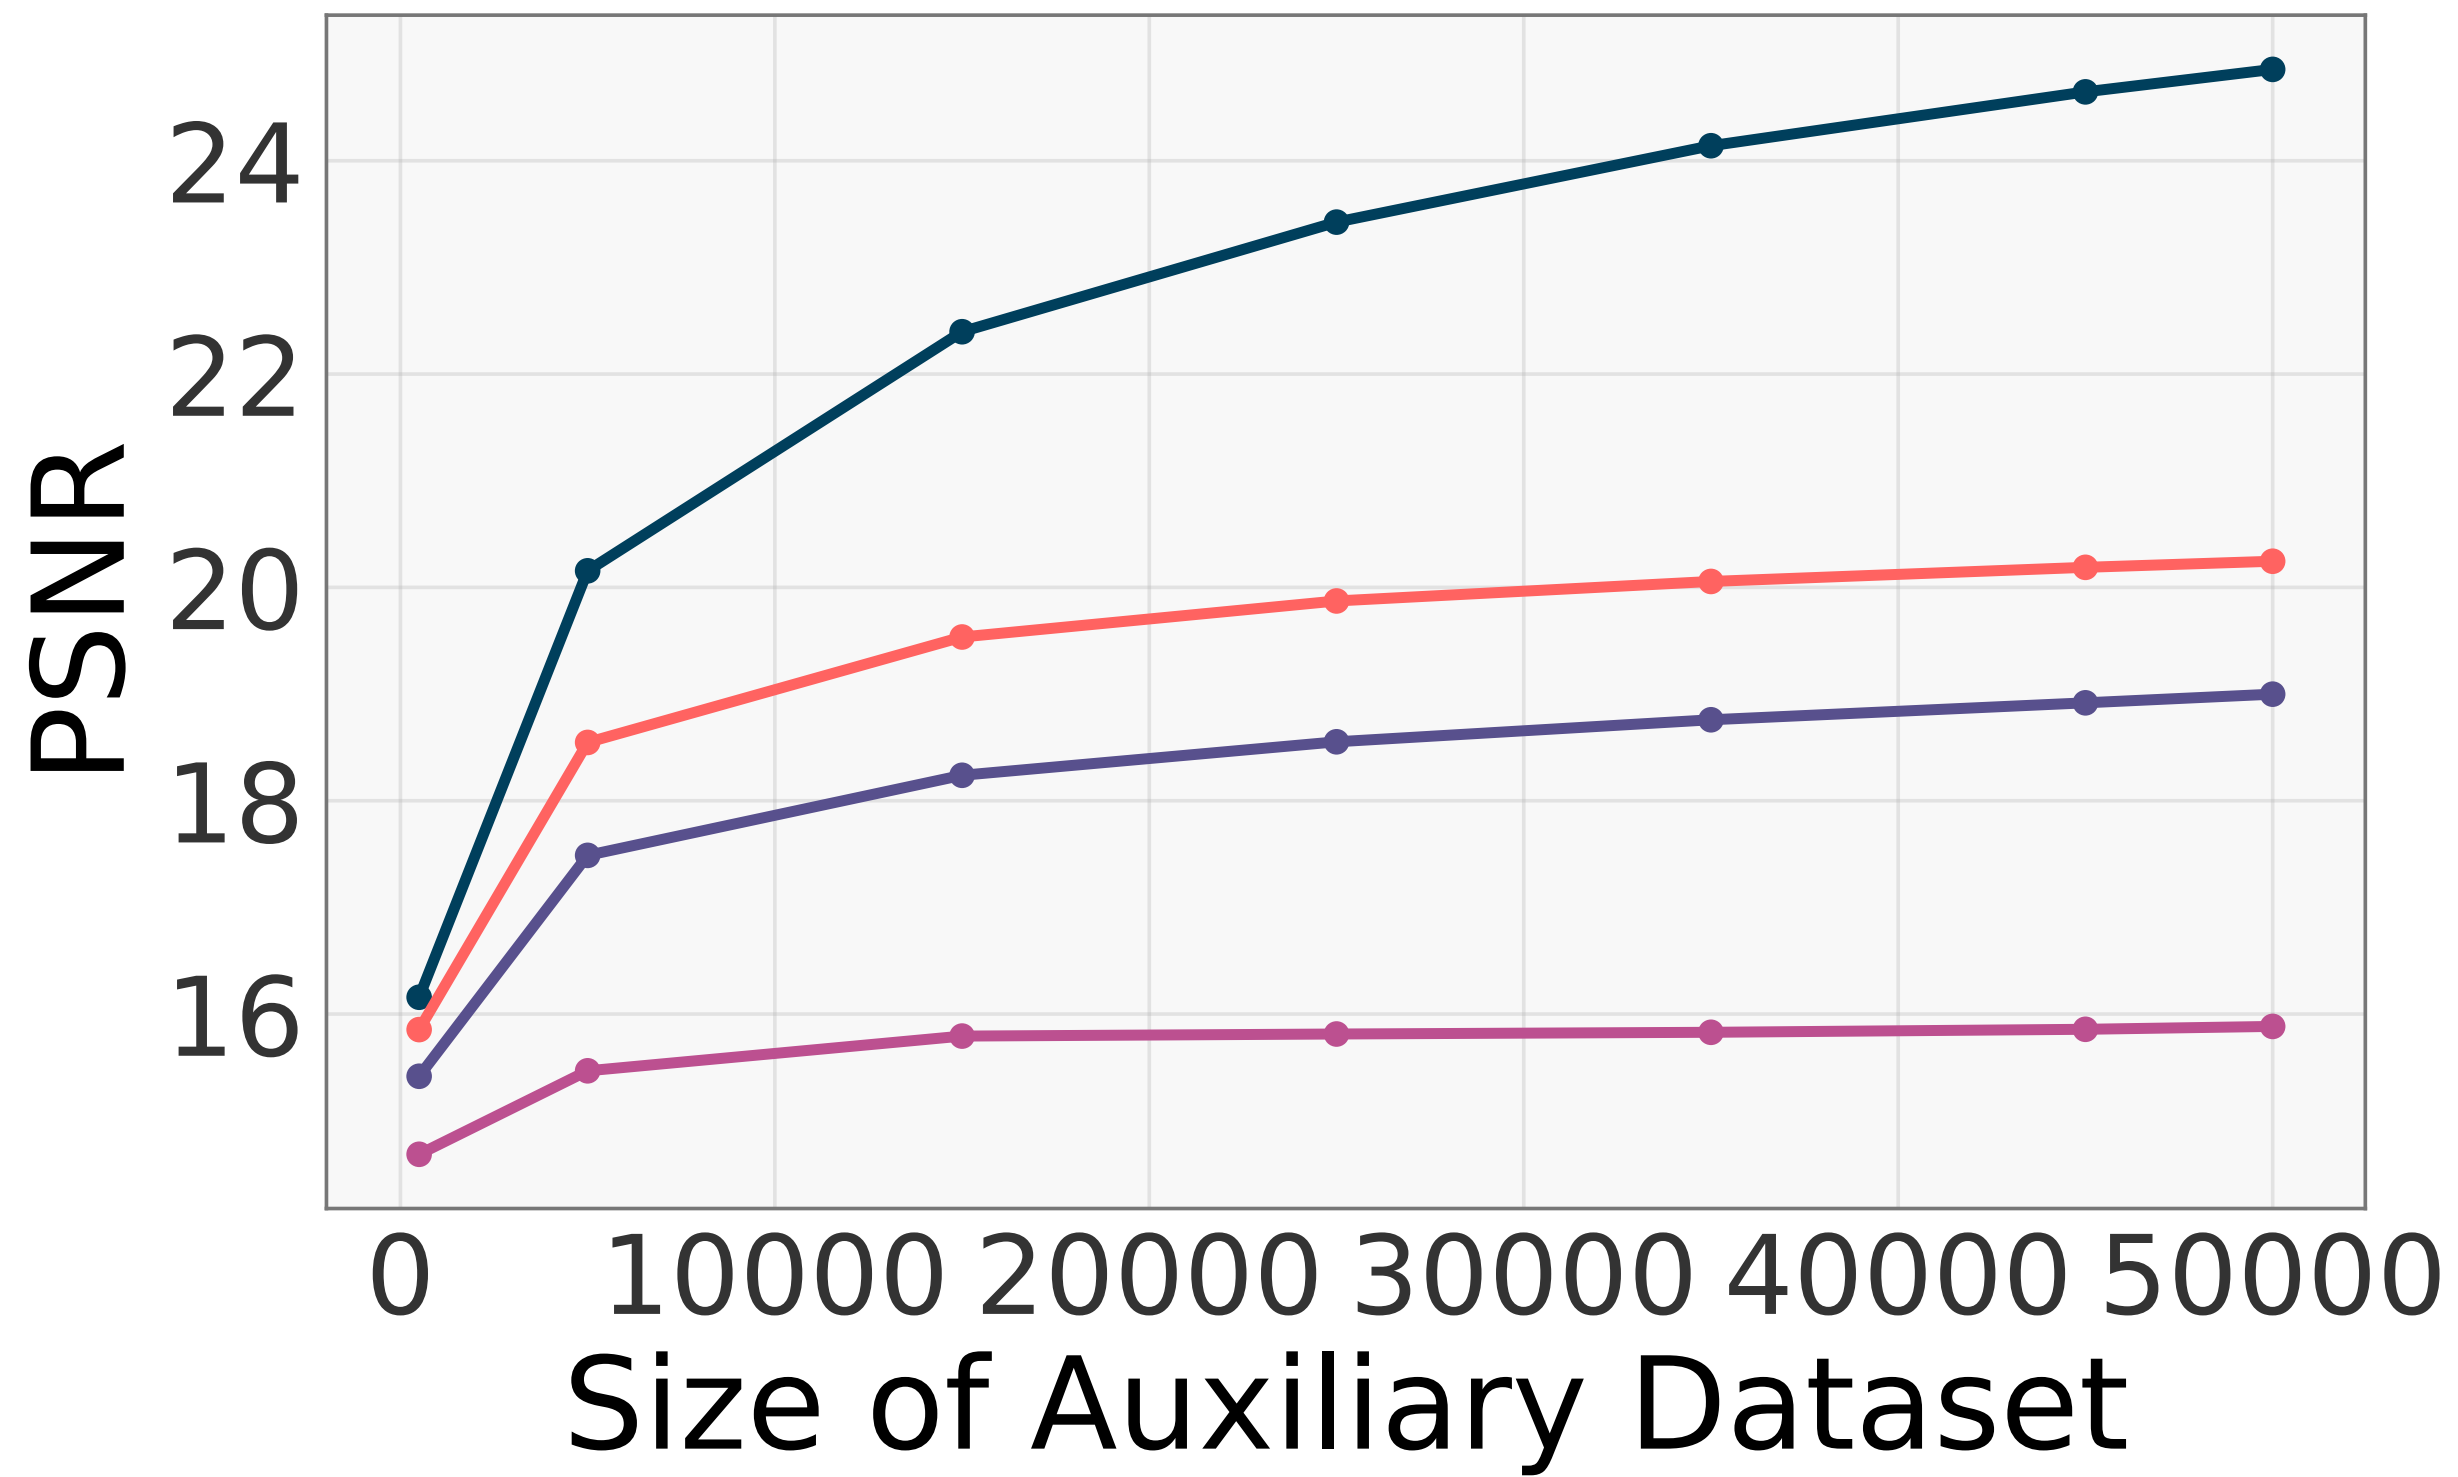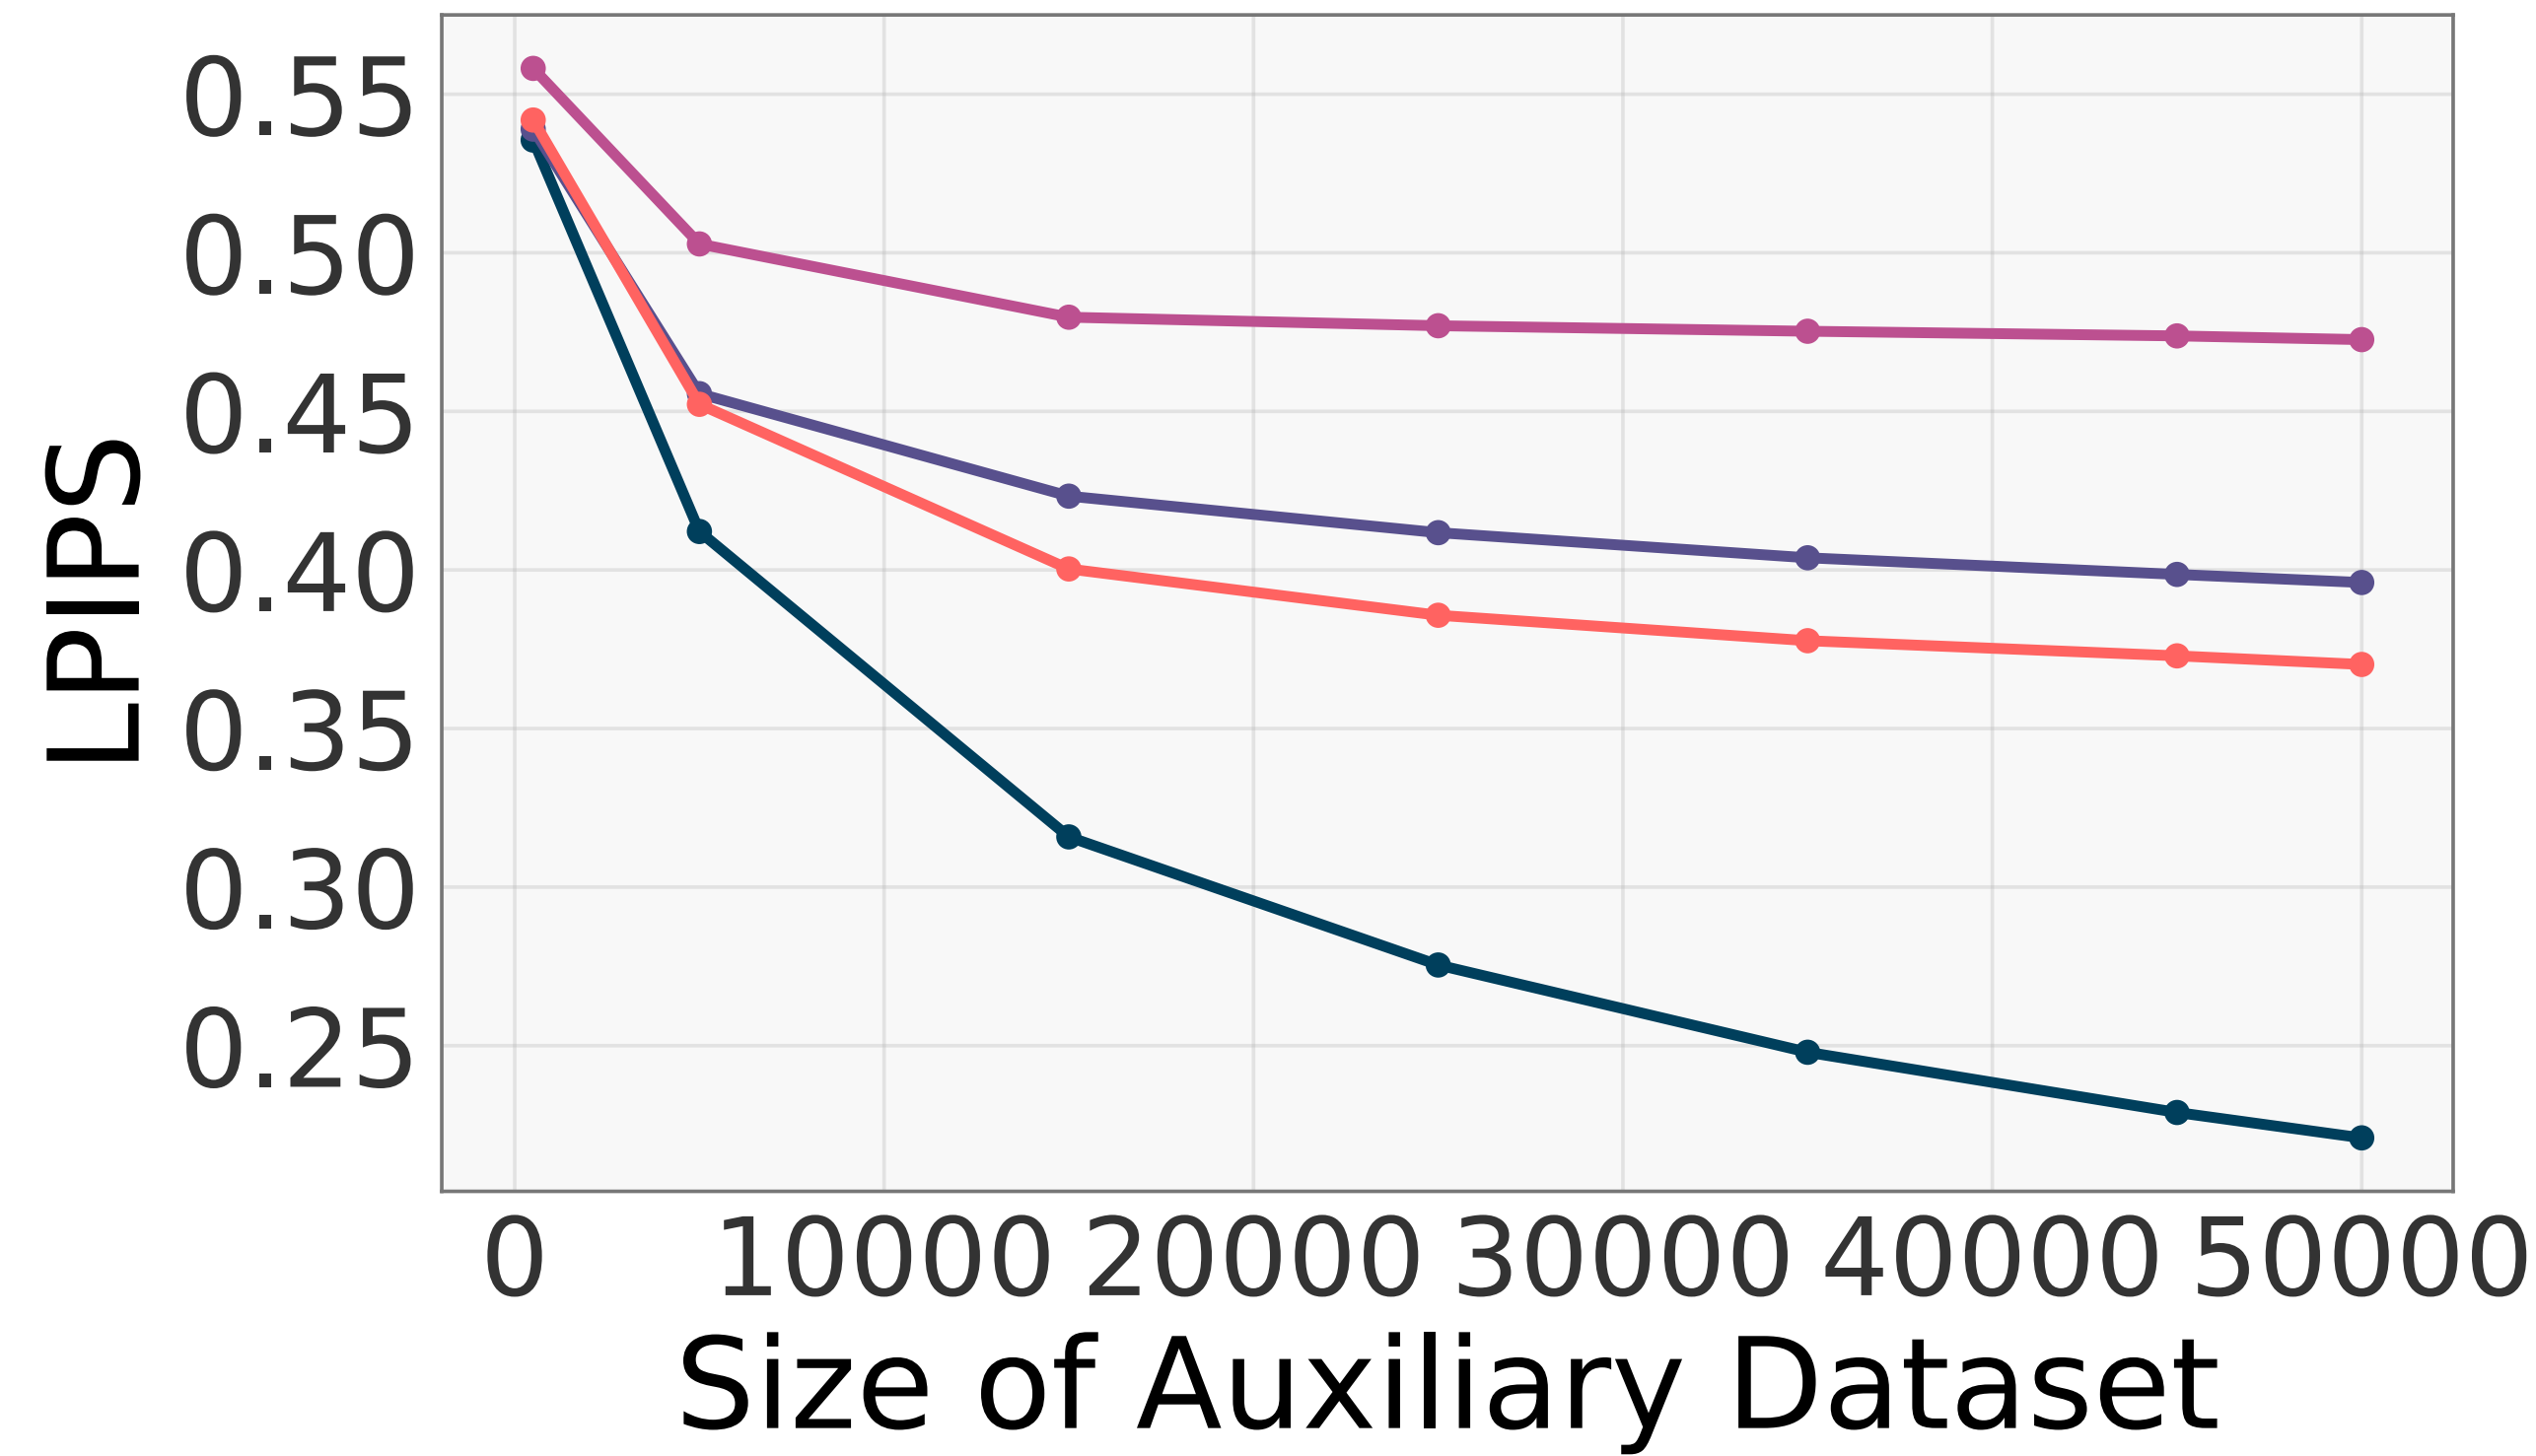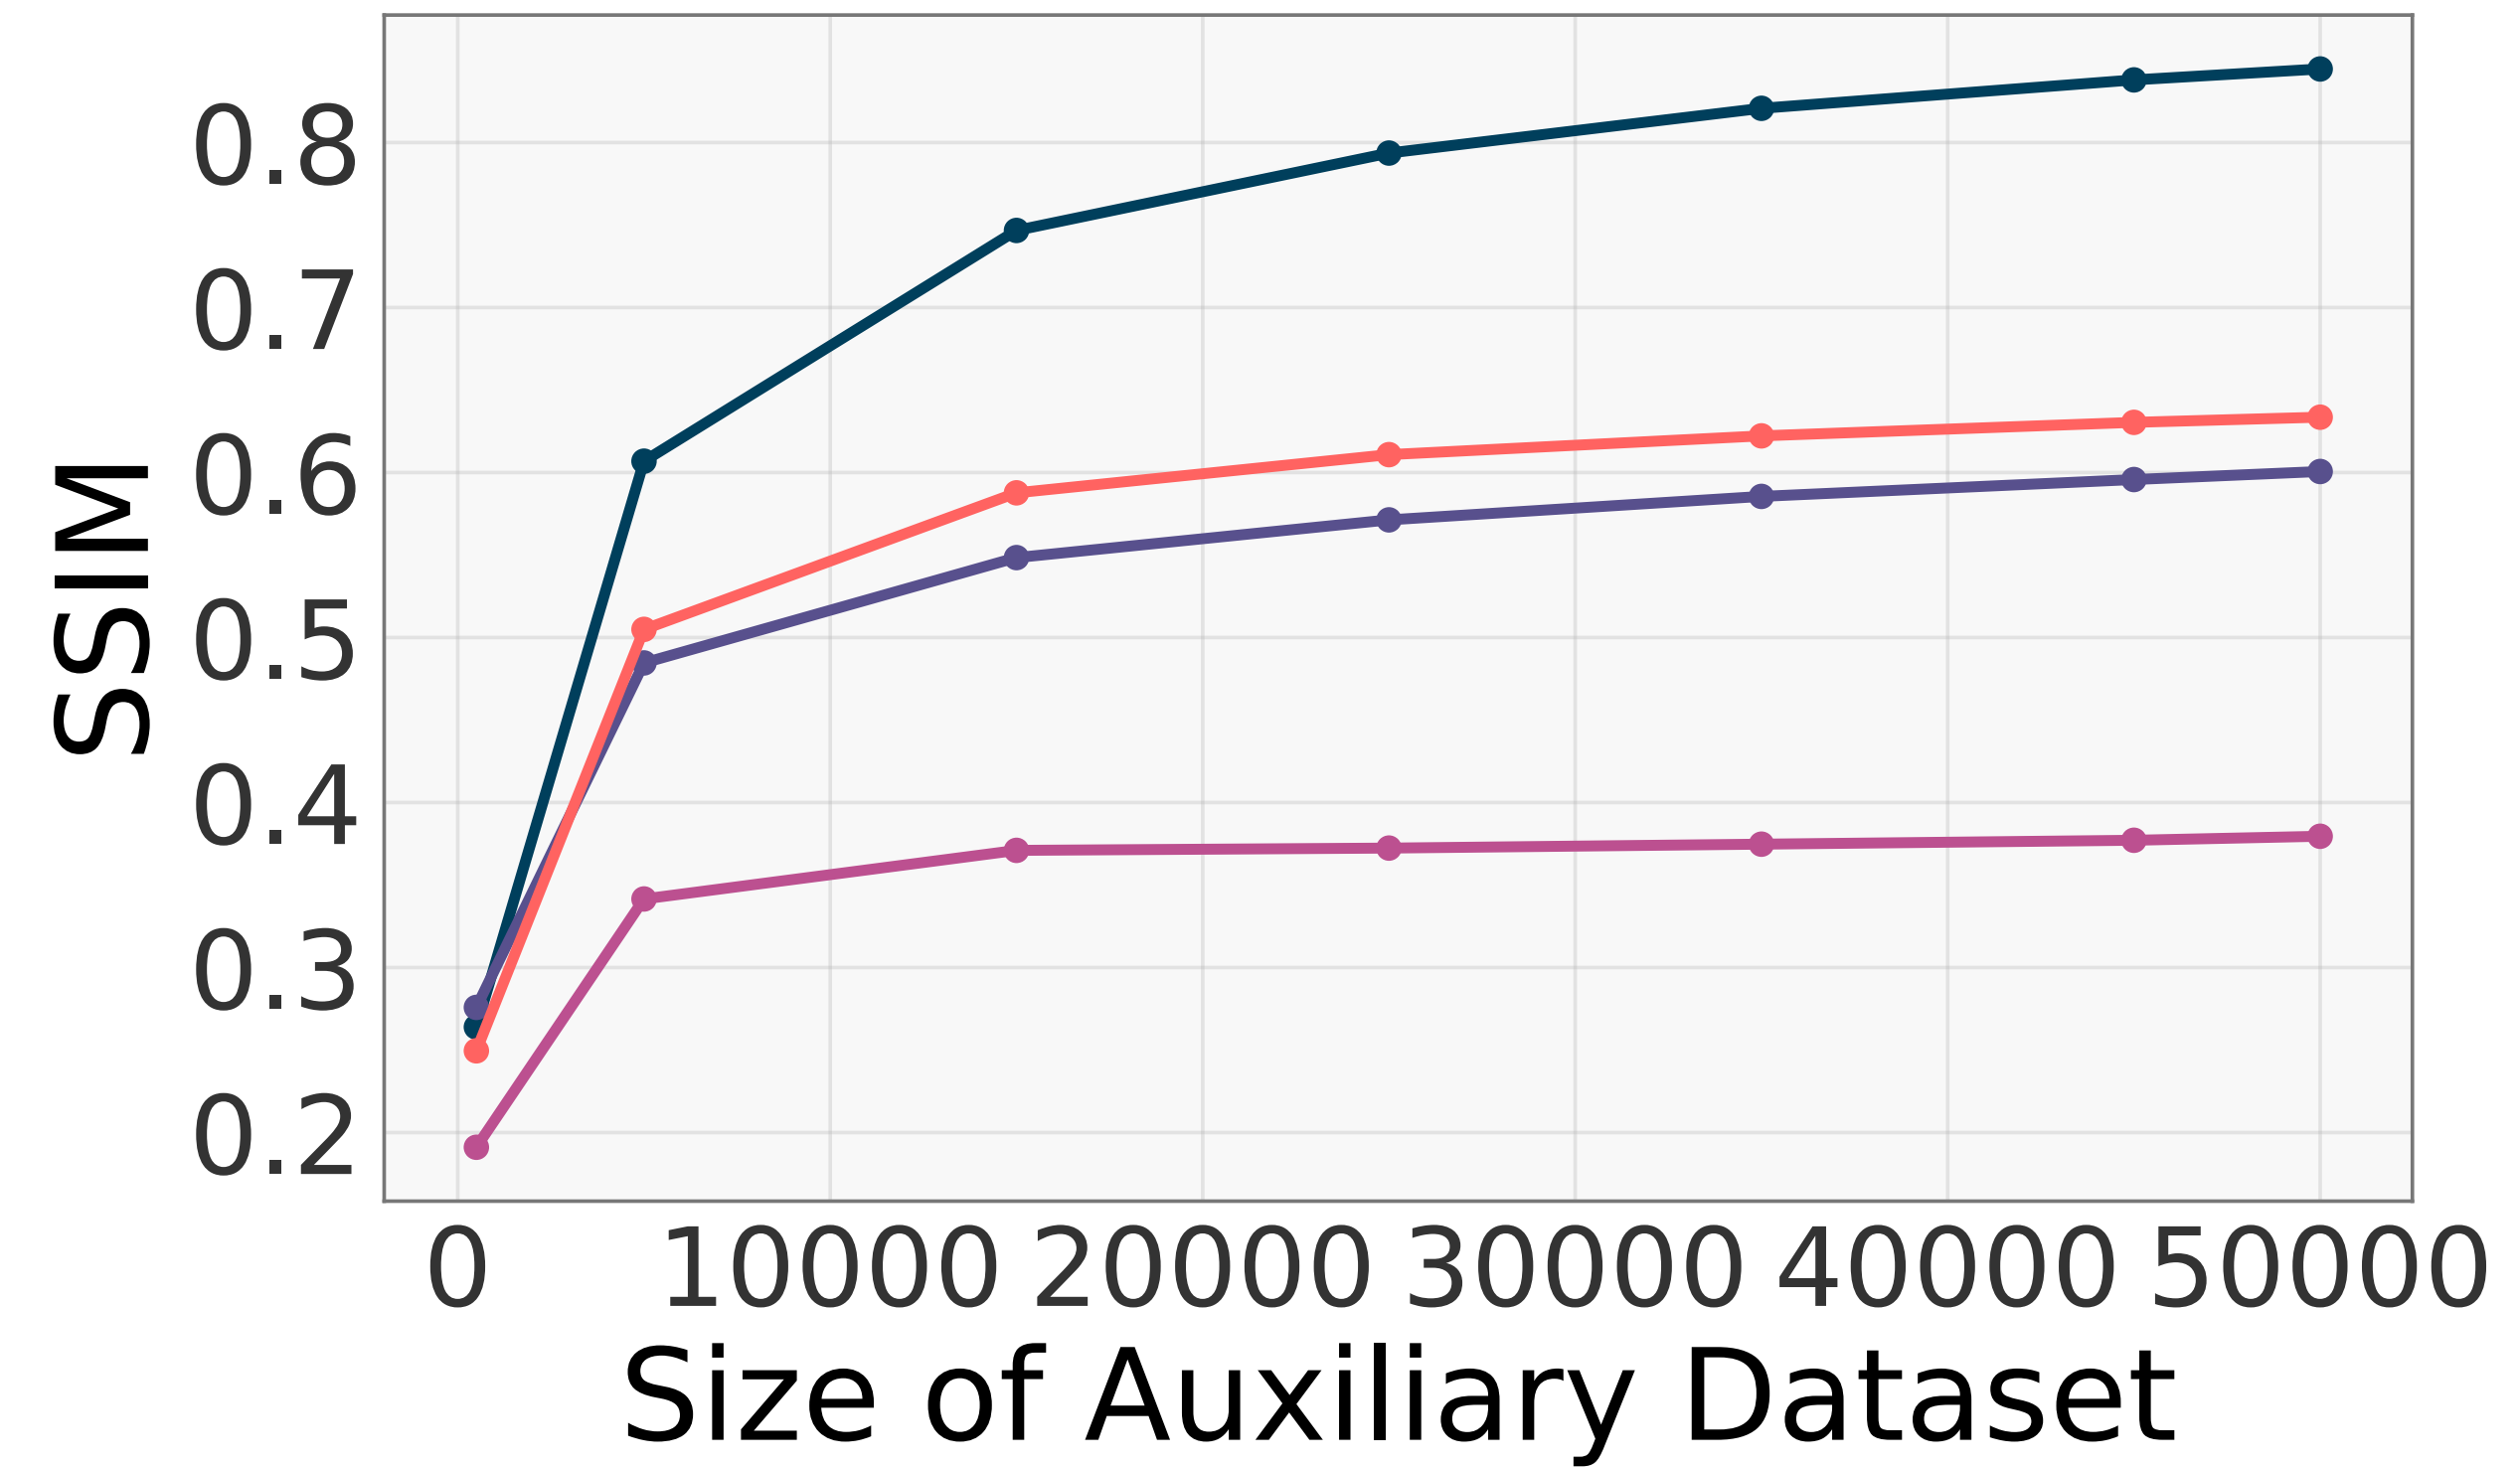

Supplement: supplementary_material [file attachment]

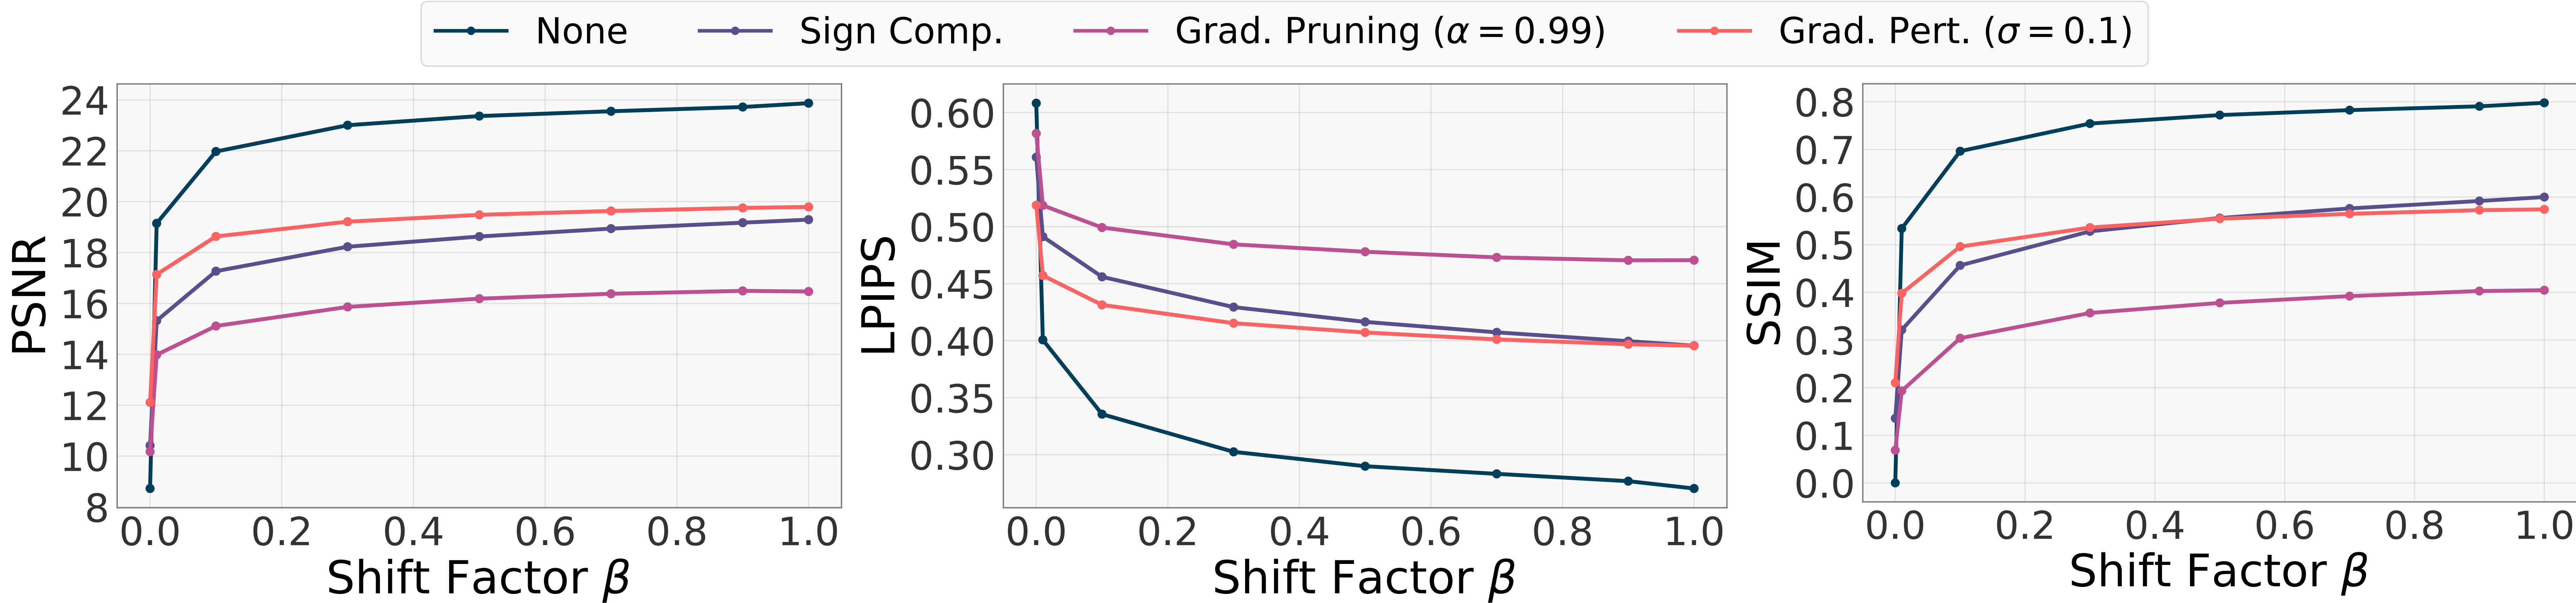

Supplement: supplementary_material [file attachment]

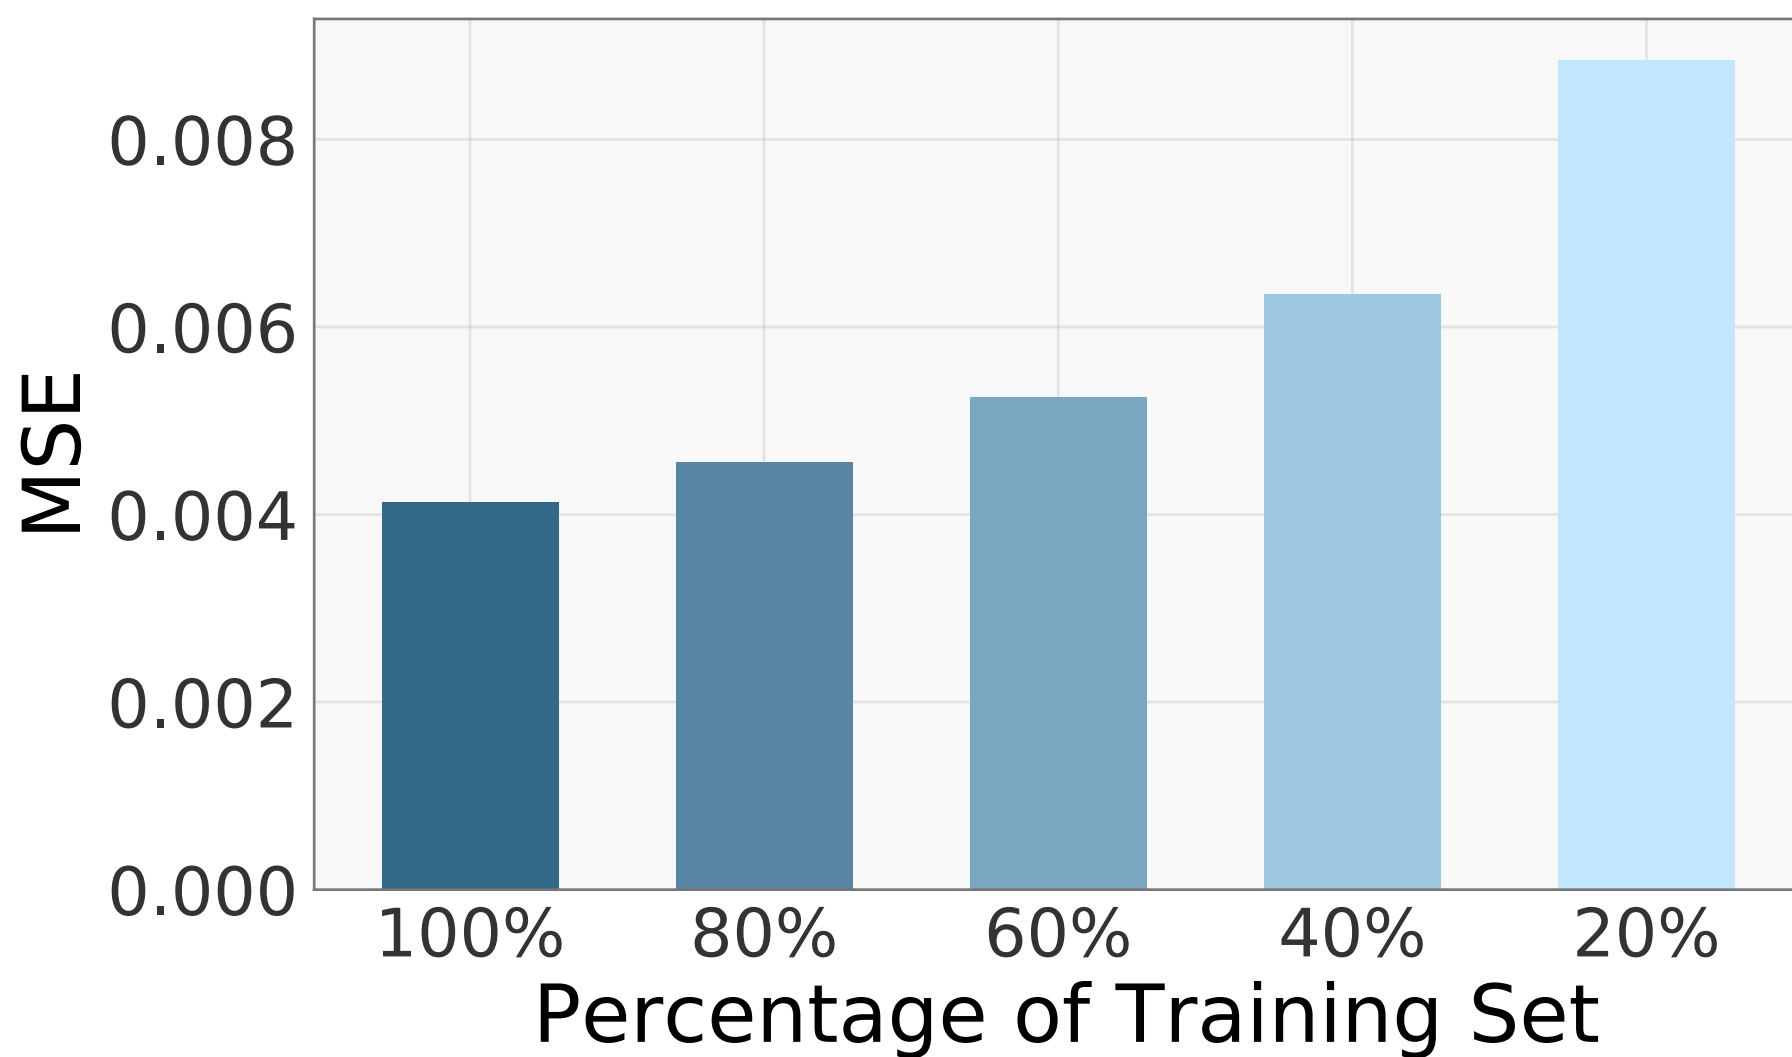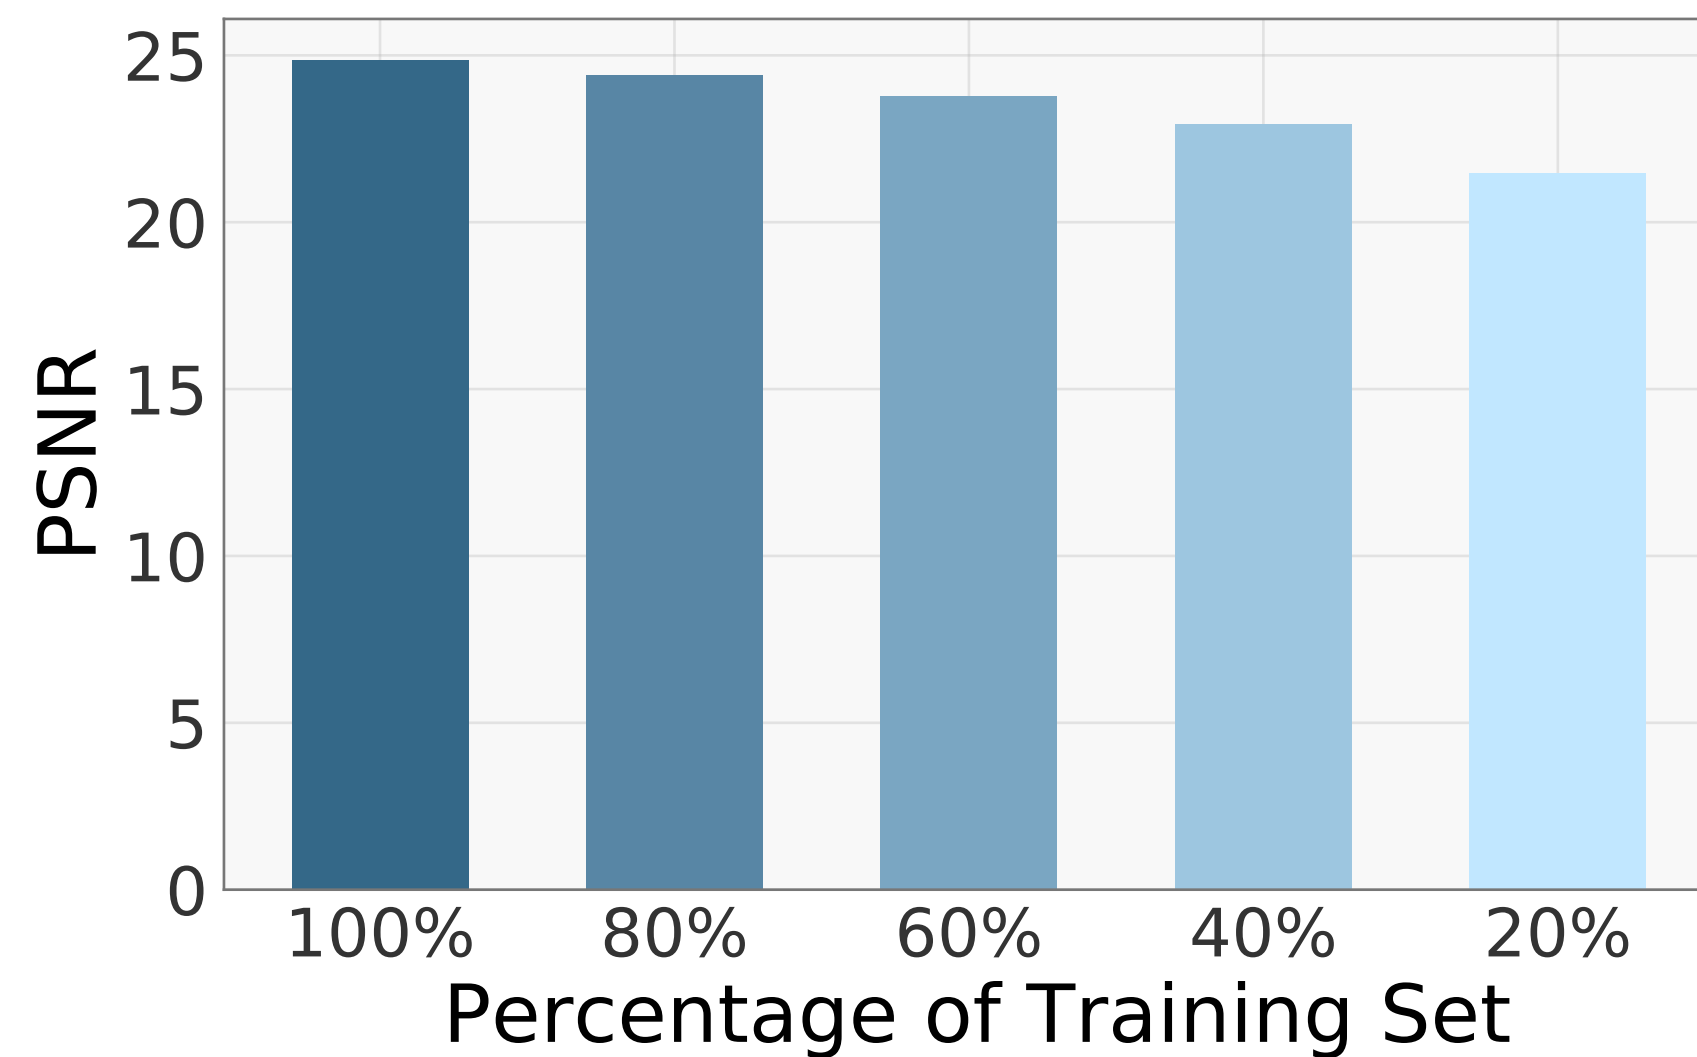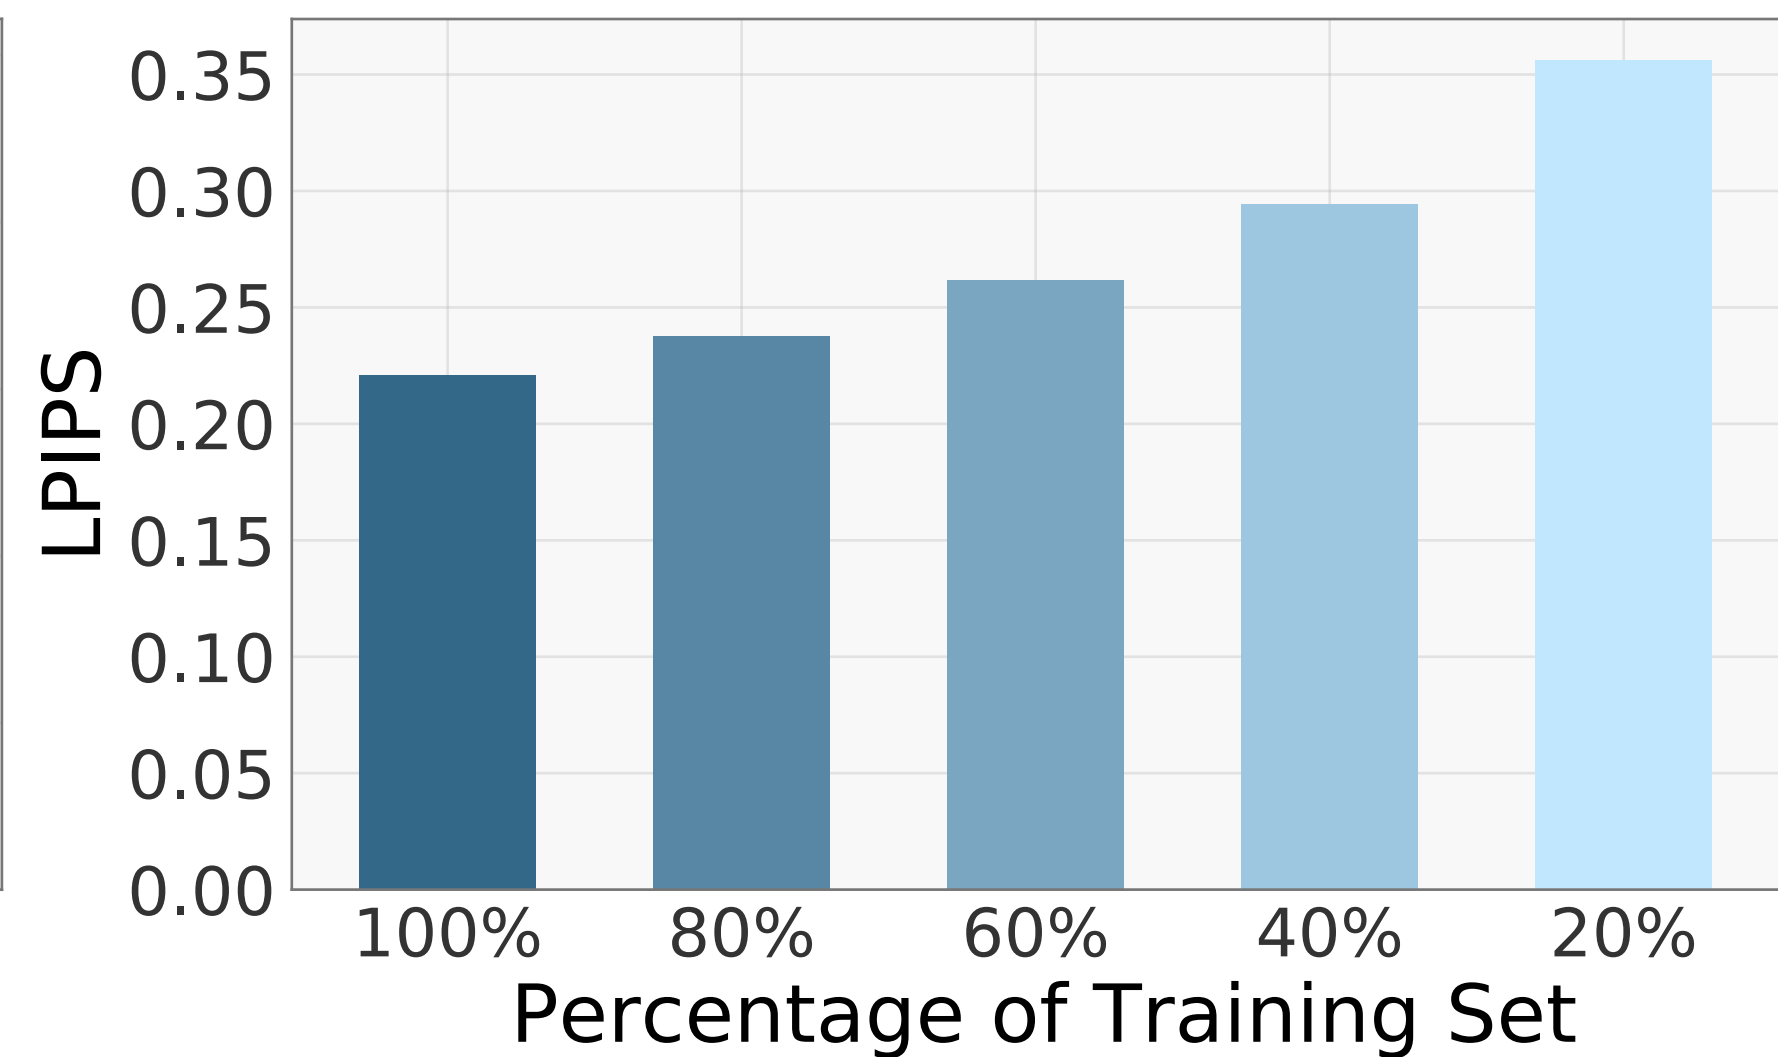

Supplement: supplementary_material [file attachment]
